# Supplementary material for: Spatial variation of parrotfish assemblages at oceanic islands in the western Caribbean: evidence of indirect effects of fishing?
Source: PeerJ journal article supplement (doi:10.7717/peerj.14178), 2022-11-28
Supplement: FIGURE_S1.pdf [file FIGURE_S1.pdf]

A)

Project Camera Picture Object points Measurement Adjustment About

Zoom 4 Lock Images measured: 40

Frame 6279 (4,60-40 minutes) Frame 7932 (4,4111 minutes)

Stereo constraint - Relative orientation

| Name                | Value                             | Units   | Precision       |
|---------------------|-----------------------------------|---------|-----------------|
| Parameter source    | Camera positions and orientations |         |                 |
| No. constraints     | 20                                |         |                 |
| Base separation (X) | 800.6497                          | mm      | 836.0 (micron)  |
| Delta Omega         | -0.23251                          | Degrees | 62.9 (Seconds)  |
| Left Phi            | -3.61840                          | Degrees | 111.6 (Seconds) |
| Left Kappa          | -179.34552                        | Degrees | 194.2 (Seconds) |
| Right Phi           | 3.81644                           | Degrees | 76.3 (Seconds)  |
| Right Kappa         | -179.79665                        | Degrees | 162.4 (Seconds) |

Close dialog

| Image file            | Frame | Camera | No. points | Oriented |
|-----------------------|-------|--------|------------|----------|
| Left despues de m...  | 7     | Left   | 67         | Yes      |
| Right despues de m... | 7     | Right  | 75         | Yes      |
| Left despues de m...  | 7     | Left   | 70         | Yes      |
| Right despues de m... | 7     | Right  | 70         | Yes      |
| Left despues de m...  | 7     | Left   | 70         | Yes      |
| Right despues de m... | 7     | Right  | 68         | Yes      |
| Left despues de m...  | 8     | Left   | 69         | Yes      |
| Right despues de m... | 7     | Right  | 70         | Yes      |
| Left despues de m...  | 8     | Left   | 69         | Yes      |
| Right despues de m... | 7     | Right  | 71         | Yes      |

Activar Windows  
Ve a Configuración para activar Windows.

B)

EventMeasure: L)16)SAI001.MP4: R)16)SAI001.MP4

Program Picture Measurement Stereo About

Zoom 4 Lock Frame 24350 ( 13,5413 mins) Frame 24714

Play movie

Data

Data view 3D Measurements

| Family   | Genus     | Species   | Number | Activity | C... | Filename       | Frame | Time (mins) | Period       | Period time (...) | Length (mm) | X (mm)   | Y (mm)  | Z (mm)    | Range (mm) | RMS (mm) | Precision (mm) |
|----------|-----------|-----------|--------|----------|------|----------------|-------|-------------|--------------|-------------------|-------------|----------|---------|-----------|------------|----------|----------------|
| Labridae | Scarus    | iseri     | 1      | Passing  | IP   | L)16)SAI000... | 22199 | 12.3451     | ErDivOpSAI16 | 3.9701            | 99.868      | 99.184   | -201... | -1012.431 | 1037.01    |          |                |
| Labridae | Scarus    | iseri     | 1      | Passing  | IP   | L)16)SAI000... | 22199 | 12.3451     | ErDivOpSAI16 | 3.9701            | 170.770     | 130.278  | -119... | -1278.191 | 1290.31    |          |                |
| Labridae | Scarus    | iseri     | 1      | Passing  | IP   | L)16)SAI000... | 22199 | 12.3451     | ErDivOpSAI16 | 3.9701            | 87.150      | 82.689   | -189... | -1198.959 | 1216.58    |          |                |
| Labridae | Scarus    | sp1       | 1      | Passing  | IP   | L)16)SAI000... | 22199 | 12.3451     | ErDivOpSAI16 | 3.9701            | 77.081      | -1.811   | -202... | -1326.257 | 1341.66    |          |                |
| Labridae | Sparisoma | viride    | 1      | Passing  | IP   | L)16)SAI000... | 22347 | 12.4274     | ErDivOpSAI16 | 4.0524            | 178.952     | 74.048   | 251.822 | -1074.677 | 1106.21    |          |                |
| Labridae | Sparisoma | atomarium | 1      | Passing  | IP   | L)16)SAI000... | 22347 | 12.4274     | ErDivOpSAI16 | 4.0524            | 103.759     | -195.449 | 189.692 | -1088.843 | 1122.38    |          |                |
| Labridae | Sparisoma | viride    | 1      | Passing  | TP   | L)16)SAI000... | 24350 | 13.5413     | ErDivOpSAI16 | 5.1663            | 287.821     | 32.863   | -159... | -1074.855 | 1087.093   | 1.873    | 0.955          |

Brightness and contrast

Brightness -42

Contrast 54
