# Supplementary material for: Spatial variation of parrotfish assemblages at oceanic islands in the western Caribbean: evidence of indirect effects of fishing?
Source: PeerJ. 2022 Nov 28;10:e14178. doi: 10.7717/peerj.14178 (PMC9744149; doi:10.7717/peerj.14178)
Supplement: Supplemental Information 10 — The raw measurements and abundances per species and locality. [file peerj-10-14178-s010.xlsx]

## Sheet: sizes
LOCALITY	STATION	YEAR	SPECIES	TL
A	1	I	4	94.927
A	1	I	4	76.466
A	1	I	4	109.847
A	1	I	4	112.708
A	1	I	4	131.285
A	1	I	4	102.946
A	1	I	2	137.102
A	1	I	2	136.769
A	1	I	2	159.826
A	1	I	2	185.449
A	1	I	2	142.674
A	1	I	2	145.646
A	1	I	2	149.55
A	1	I	2	106.297
A	1	I	2	81.006
A	1	I	2	80.244
A	1	I	2	64.057
A	1	I	2	110.905
A	1	I	2	93.613
A	1	I	2	86.251
A	1	I	2	88.455
A	1	I	2	86.665
A	1	I	2	76.456
A	1	I	2	79.407
A	1	I	2	76.344
A	1	I	2	78.652
A	1	I	2	77.874
A	1	I	2	134.76
A	1	I	2	100.159
A	1	I	2	79.644
A	1	I	2	84.752
A	1	I	2	114.108
A	1	I	2	102.299
A	1	I	2	126.119
A	1	I	2	72.173
A	1	I	2	43.58
A	1	I	2	39.898
A	1	I	2	119.104
A	1	I	2	127.782
A	1	I	2	112.701
A	1	I	2	103.153
A	1	I	2	125.722
A	1	I	8	311.461
A	1	I	8	549.23
A	1	I	8	346.834
A	1	I	8	183.801
A	1	I	8	236.275
A	1	I	8	260.645
A	1	I	8	202.144
A	1	I	8	270.695
A	1	I	8	78.702
A	1	I	8	149.629
A	1	I	8	190.99
A	1	I	8	216.21
A	1	I	8	156.746
A	1	I	8	214.442
A	1	I	8	198.298
A	1	I	8	199.606
A	1	I	8	242.084
A	1	I	8	207.638
A	1	I	7	294.856
A	1	I	7	203.902
A	1	I	7	218.635
A	1	I	7	205.722
A	1	I	3	207.357
A	1	I	3	247.982
A	1	I	3	236.991
A	1	I	3	198.869
A	1	I	3	228.382
A	1	I	3	210.507
A	1	I	3	207.408
A	1	I	3	219.935
A	1	I	3	152.727
A	1	I	3	173.906
A	1	I	3	175.232
A	1	I	3	161.495
A	1	I	3	180.153
A	1	I	3	144.934
A	1	I	3	172.395
A	1	I	3	115.141
A	1	I	3	103.447
A	1	I	3	146.265
A	1	I	3	193.048
A	1	I	3	135.997
A	1	I	3	109.985
A	1	I	3	149.71
A	1	I	3	52.015
A	1	I	3	56.383
A	1	I	3	74.536
A	2	I	4	118.894
A	2	I	2	140.83
A	2	I	2	158.287
A	2	I	2	151.396
A	2	I	2	147.828
A	2	I	2	145.536
A	2	I	2	146.326
A	2	I	2	159.639
A	2	I	2	139.969
A	2	I	2	155.454
A	2	I	2	92.161
A	2	I	2	87.048
A	2	I	2	98.929
A	2	I	2	91.02
A	2	I	2	111.714
A	2	I	2	103.693
A	2	I	2	103.938
A	2	I	2	81.791
A	2	I	2	120.415
A	2	I	2	58.797
A	2	I	2	147.255
A	2	I	2	109.561
A	2	I	2	124.989
A	2	I	2	92.471
A	2	I	2	89.443
A	2	I	2	100.541
A	2	I	2	80.891
A	2	I	2	116.271
A	2	I	2	121.992
A	2	I	2	99.794
A	2	I	2	126.001
A	2	I	8	335.854
A	2	I	8	390.389
A	2	I	8	375.415
A	2	I	8	389.817
A	2	I	8	267.227
A	2	I	8	122.602
A	2	I	8	180.697
A	2	I	8	119.901
A	2	I	8	266.694
A	2	I	8	246.87
A	2	I	8	172.949
A	2	I	8	199.846
A	2	I	8	212.64
A	2	I	8	219.93
A	2	I	8	190.176
A	2	I	8	144.206
A	2	I	7	158.977
A	2	I	3	212.364
A	2	I	3	238.364
A	2	I	3	210.846
A	2	I	3	239.671
A	2	I	3	232.448
A	2	I	3	116.478
A	2	I	3	77.308
A	2	I	3	88.696
A	2	I	3	160.572
A	2	I	3	165.135
A	2	I	3	142.407
A	2	I	3	104.41
A	2	I	3	65.724
A	2	I	3	44.951
A	2	I	3	59.719
A	2	I	3	57.999
A	2	I	3	96.373
A	2	I	3	116.453
A	2	I	1	80.418
A	2	I	1	72.513
A	2	I	1	70.311
A	2	I	1	67.837
A	3	I	4	259.367
A	3	I	4	270.493
A	3	I	4	224.99
A	3	I	4	182.324
A	3	I	8	332.42
A	3	I	8	336.084
A	3	I	8	281.644
A	3	I	8	269.904
A	3	I	8	380.667
A	3	I	8	235.728
A	3	I	8	249.766
A	3	I	8	299.717
A	3	I	8	225.707
A	3	I	8	297.308
A	3	I	8	310.411
A	3	I	8	275.177
A	3	I	8	295.362
A	3	I	8	295.358
A	3	I	8	522.502
A	3	I	8	283.268
A	3	I	8	280.125
A	3	I	8	301.251
A	3	I	7	363.216
A	3	I	7	310.674
A	3	I	7	264.973
A	3	I	7	350.974
A	3	I	7	369.846
A	3	I	7	195.258
A	3	I	7	231.042
A	3	I	7	195.88
A	3	I	7	268.869
A	3	I	7	299.016
A	3	I	3	256.821
A	3	I	3	234.211
A	3	I	3	107.566
A	3	I	3	188.53
A	3	I	3	158.46
A	3	I	6	123.464
A	3	I	6	324.864
A	3	I	6	224.726
A	3	I	6	331.018
A	3	I	6	339.421
A	4	I	4	164.62
A	4	I	4	91.889
A	4	I	2	147.289
A	4	I	2	154.983
A	4	I	2	141.565
A	4	I	2	139.393
A	4	I	2	133.946
A	4	I	2	158.948
A	4	I	2	136.246
A	4	I	2	148.646
A	4	I	2	135.118
A	4	I	2	143.287
A	4	I	2	100.892
A	4	I	2	91.054
A	4	I	2	104.844
A	4	I	2	145.653
A	4	I	8	147.289
A	4	I	8	165.655
A	4	I	8	262.399
A	4	I	8	262.826
A	4	I	8	259.51
A	4	I	8	246.268
A	4	I	8	92.559
A	4	I	8	249.159
A	4	I	8	150.575
A	4	I	8	76.98
A	4	I	8	154.672
A	4	I	8	205.6
A	4	I	8	66.165
A	4	I	7	258.575
A	4	I	7	200.65
A	4	I	7	276.515
A	4	I	7	104.489
A	4	I	3	199.423
A	4	I	3	219.166
A	4	I	3	217.175
A	4	I	3	225.786
A	4	I	3	148.441
A	4	I	3	196.518
A	4	I	3	100.591
A	4	I	3	149.003
A	4	I	3	107.112
A	4	I	3	135.52
A	4	I	3	76.106
A	4	I	3	104.566
A	4	I	3	126.916
A	4	I	3	68.486
A	4	I	3	169.233
A	4	I	3	96.15
A	4	I	3	110.323
A	4	I	3	80.464
A	4	I	3	74.913
A	4	I	3	78.485
A	4	I	6	112.608
A	4	I	6	179.843
A	5	I	4	234.704
A	5	I	4	254.564
A	5	I	4	159.263
A	5	I	4	135.406
A	5	I	2	146.263
A	5	I	2	153.824
A	5	I	2	129.133
A	5	I	8	297.358
A	5	I	8	259.018
A	5	I	8	314.085
A	5	I	3	266.008
A	5	I	3	222.013
A	5	I	3	231.595
A	5	I	3	242.141
A	5	I	3	130.542
A	5	I	3	182.406
A	5	I	3	93.097
A	5	I	5	356.852
A	5	I	6	266.008
A	6	I	4	70.808
A	6	I	4	145.606
A	6	I	4	111.291
A	6	I	2	164.699
A	6	I	2	159.506
A	6	I	2	153.486
A	6	I	2	146.983
A	6	I	2	129.973
A	6	I	2	151.494
A	6	I	2	152.567
A	6	I	2	155.276
A	6	I	2	134.291
A	6	I	2	89.16
A	6	I	2	122.253
A	6	I	2	139.129
A	6	I	8	358.289
A	6	I	8	378.065
A	6	I	8	165.295
A	6	I	8	91.339
A	6	I	8	181.57
A	6	I	8	112.886
A	6	I	8	113.064
A	6	I	8	239.433
A	6	I	8	164.768
A	6	I	8	64.124
A	6	I	8	41.29
A	6	I	8	41.237
A	6	I	8	69.172
A	6	I	3	243.892
A	6	I	3	164.699
A	6	I	3	214.136
A	6	I	3	184.103
A	6	I	3	34.242
A	6	I	3	129.393
A	6	I	3	51.152
A	6	I	3	70.993
A	6	I	3	62.082
A	6	I	3	45.042
A	6	I	1	75.7
A	6	I	1	59.644
A	6	I	1	74.904
A	7	I	4	137.258
A	7	I	4	160.079
A	7	I	4	250.578
A	7	I	4	150.492
A	7	I	4	140.163
A	7	I	4	126.698
A	7	I	4	147.052
A	7	I	4	141.982
A	7	I	4	146.193
A	7	I	4	150.605
A	7	I	4	197.495
A	7	I	4	186.436
A	7	I	4	206.756
A	7	I	4	138.886
A	7	I	4	210.222
A	7	I	4	174.5
A	7	I	4	186.293
A	7	I	4	209.853
A	7	I	4	122.571
A	7	I	2	119.524
A	7	I	2	161.752
A	7	I	2	142.116
A	7	I	8	378.444
A	7	I	3	209.491
A	7	I	3	201.09
A	7	I	3	120.013
A	7	I	3	182.164
A	7	I	3	195.206
A	7	I	3	193.461
A	7	I	3	167.543
A	7	I	3	178.028
A	7	I	3	185.491
A	7	I	3	152.651
A	7	I	3	64.406
A	7	I	3	46.796
A	7	I	3	89.965
A	7	I	3	69.854
A	7	I	1	143.61
A	7	I	2	91.302
A	8	I	4	238.538
A	8	I	4	233.507
A	8	I	4	208.036
A	8	I	4	238.71
A	8	I	4	228.218
A	8	I	4	233.55
A	8	I	4	187.104
A	8	I	4	186.642
A	8	I	4	214.6
A	8	I	4	197.524
A	8	I	4	190.759
A	8	I	2	159.198
A	8	I	2	175.559
A	8	I	2	163.437
A	8	I	2	146.421
A	8	I	2	176.478
A	8	I	2	175.596
A	8	I	8	282.65
A	8	I	8	284.937
A	8	I	7	214.411
A	8	I	3	186.848
A	8	I	3	201.113
A	8	I	3	190.988
A	8	I	3	137.258
A	8	I	3	160.079
A	8	I	3	190.931
A	8	I	3	167.421
A	8	I	3	147.356
A	8	I	3	141.507
A	8	I	3	91.302
A	8	I	3	63.336
A	8	I	1	54.787
A	8	I	4	161.373
A	9	I	4	148.973
A	9	I	4	108.237
A	9	I	4	101.642
A	9	I	2	94.537
A	9	I	2	161.564
A	9	I	2	157.783
A	9	I	2	152.689
A	9	I	2	145.907
A	9	I	2	159.89
A	9	I	2	151.639
A	9	I	2	141.536
A	9	I	2	160.906
A	9	I	2	159.918
A	9	I	2	126.263
A	9	I	2	165.457
A	9	I	8	383.915
A	9	I	8	397.022
A	9	I	8	327.917
A	9	I	8	412.568
A	9	I	8	318.159
A	9	I	8	330.857
A	9	I	8	324.872
A	9	I	8	356.653
A	9	I	8	325.713
A	9	I	8	425.572
A	9	I	8	409.625
A	9	I	8	275.381
A	9	I	8	390.353
A	9	I	8	334.435
A	9	I	8	377.755
A	9	I	8	282.56
A	9	I	8	336.396
A	9	I	8	397.44
A	9	I	8	358.734
A	9	I	8	405.864
A	9	I	8	265.623
A	9	I	8	88.554
A	9	I	8	81.448
A	9	I	8	285.556
A	9	I	8	147.269
A	9	I	8	71.445
A	9	I	8	219.064
A	9	I	8	189.663
A	9	I	8	256.648
A	9	I	8	267.657
A	9	I	8	244.33
A	9	I	8	125.676
A	9	I	8	210.126
A	9	I	8	304.907
A	9	I	8	218.689
A	9	I	8	242.424
A	9	I	8	125.345
A	9	I	8	125.399
A	9	I	8	147.649
A	9	I	8	252.683
A	9	I	8	181.532
A	9	I	8	279.904
A	9	I	8	269.521
A	9	I	8	209.4
A	9	I	8	60.748
A	9	I	8	73.854
A	9	I	8	68.456
A	9	I	8	88.453
A	9	I	8	64.528
A	9	I	7	224.006
A	9	I	7	307.61
A	9	I	7	279.773
A	9	I	7	292.631
A	9	I	7	208.008
A	9	I	7	243.72
A	9	I	7	232.991
A	9	I	7	168.26
A	9	I	7	105.997
A	9	I	7	232.725
A	9	I	7	208.584
A	9	I	7	146.549
A	9	I	7	159.109
A	9	I	3	230.608
A	9	I	3	238.399
A	9	I	3	242.189
A	9	I	3	232.818
A	9	I	3	118.089
A	9	I	3	114.658
A	9	I	3	101.046
A	9	I	3	106.514
A	9	I	3	97.461
A	9	I	3	89.4
A	9	I	3	231.26
A	9	I	3	172.754
A	9	I	3	155.403
A	9	I	3	121.889
A	9	I	3	157.124
A	9	I	3	152.568
A	9	I	3	112.187
A	9	I	3	61.373
A	9	I	3	71.323
A	9	I	3	79.542
A	9	I	3	84.091
A	9	I	3	172.344
A	9	I	3	112.203
A	9	I	1	350.283
A	9	I	1	83.786
A	9	I	1	87.405
A	9	I	1	60.191
A	9	I	1	76.53
A	10	I	4	170.663
A	10	I	4	64.406
A	10	I	4	46.796
A	10	I	4	139.993
A	10	I	4	119.51
A	10	I	2	162.552
A	10	I	2	126.32
A	10	I	2	133.995
A	10	I	2	155.456
A	10	I	2	152.996
A	10	I	2	142.556
A	10	I	2	146.827
A	10	I	2	141.666
A	10	I	2	144.414
A	10	I	2	144.661
A	10	I	2	144.419
A	10	I	8	350.283
A	10	I	8	269.53
A	10	I	8	366.844
A	10	I	8	223.289
A	10	I	8	215.781
A	10	I	8	325.23
A	10	I	8	190.905
A	10	I	8	335.888
A	10	I	8	364.927
A	10	I	8	250.798
A	10	I	8	356.302
A	10	I	8	214.556
A	10	I	8	218.298
A	10	I	8	262.025
A	10	I	8	169.995
A	10	I	8	183.139
A	10	I	8	158.9
A	10	I	8	105.685
A	10	I	8	200.338
A	10	I	8	191.131
A	10	I	8	77.637
A	10	I	8	68.1
A	10	I	8	74.102
A	10	I	8	49.404
A	10	I	8	42.849
A	10	I	7	157.074
A	10	I	7	90.733
A	10	I	7	113.609
A	10	I	3	230.568
A	10	I	3	220.614
A	10	I	3	223.856
A	10	I	3	217.886
A	10	I	3	194.819
A	10	I	3	193.258
A	10	I	3	205.147
A	10	I	3	231.107
A	10	I	3	233.621
A	10	I	3	228.265
A	10	I	3	174.892
A	10	I	3	124.871
A	10	I	3	130.827
A	10	I	3	158.801
A	10	I	3	148.973
A	10	I	3	119.095
A	10	I	3	154.167
A	10	I	3	86.21
A	10	I	3	135.071
A	10	I	3	91.347
A	10	I	3	121.911
A	10	I	3	99.597
A	10	I	3	97.87
A	10	I	3	70.05
A	10	I	3	113.158
A	10	I	3	84.907
A	10	I	3	68.613
A	10	I	3	43.54
A	10	I	9	267.763
A	10	I	9	331.583
A	10	I	9	419.906
A	10	I	9	314.588
A	10	I	1	81.142
A	10	I	1	53.672
A	10	I	1	56.239
A	10	I	1	97.167
A	11	I	4	129.538
A	11	I	4	210.658
A	11	I	4	241.654
A	11	I	4	149.158
A	11	I	4	214.436
A	11	I	4	247.813
A	11	I	4	215.652
A	11	I	4	109.69
A	11	I	4	140.691
A	11	I	4	127.668
A	11	I	4	158.317
A	11	I	4	137.799
A	11	I	4	144.548
A	11	I	4	107.271
A	11	I	4	103.625
A	11	I	4	90.169
A	11	I	4	115.429
A	11	I	4	149.66
A	11	I	4	117.405
A	11	I	4	127.639
A	11	I	4	166.619
A	11	I	4	168.524
A	11	I	4	140.306
A	11	I	4	78.596
A	11	I	4	77.909
A	11	I	4	66.729
A	11	I	4	73.038
A	11	I	4	116.083
A	11	I	4	119.34
A	11	I	2	166.651
A	11	I	2	164.27
A	11	I	2	113.358
A	11	I	2	228.026
A	11	I	8	401.943
A	11	I	8	376.643
A	11	I	8	385.424
A	11	I	8	278.374
A	11	I	8	247.307
A	11	I	8	301.723
A	11	I	8	320.306
A	11	I	8	246.082
A	11	I	8	392.489
A	11	I	8	271.072
A	11	I	8	271.123
A	11	I	8	272.133
A	11	I	8	147.133
A	11	I	8	181.282
A	11	I	7	294.019
A	11	I	7	148.268
A	11	I	7	195.002
A	11	I	3	228.026
A	11	I	3	256.966
A	11	I	3	219.451
A	11	I	3	223.064
A	11	I	3	247.106
A	11	I	3	235.608
A	11	I	3	129.538
A	11	I	3	118.25
A	11	I	3	109.232
A	11	I	3	160.364
A	11	I	3	174.645
A	11	I	3	130.1
A	11	I	3	209.356
A	11	I	3	120.532
A	11	I	3	159.61
A	11	I	3	169.125
A	11	I	3	143.045
A	11	I	3	145.804
A	11	I	3	166.044
A	11	I	3	174.794
A	11	I	3	196.608
A	11	I	3	185.074
A	11	I	3	162.437
A	11	I	3	73.357
A	11	I	1	101.273
A	11	I	5	322.414
A	11	I	5	314.899
A	12	I	4	221.176
A	12	I	4	214.814
A	12	I	4	228.748
A	12	I	4	76.655
A	12	I	4	103.422
A	12	I	4	123.675
A	12	I	4	97.801
A	12	I	4	170.447
A	12	I	4	157.167
A	12	I	4	209.882
A	12	I	4	172.085
A	12	I	4	211.062
A	12	I	4	146.476
A	12	I	4	138.387
A	12	I	4	151.929
A	12	I	4	128.39
A	12	I	4	178.177
A	12	I	4	198.304
A	12	I	4	156.673
A	12	I	4	149.427
A	12	I	4	169.18
A	12	I	4	172.05
A	12	I	4	185.255
A	12	I	4	132.209
A	12	I	4	126.648
A	12	I	4	179.24
A	12	I	4	179.552
A	12	I	4	151.855
A	12	I	2	163.407
A	12	I	2	147.569
A	12	I	2	150.711
A	12	I	2	164.868
A	12	I	2	172.657
A	12	I	2	182.584
A	12	I	2	168.996
A	12	I	2	109.591
A	12	I	2	82.161
A	12	I	2	93.911
A	12	I	2	84.351
A	12	I	2	95.125
A	12	I	2	95.077
A	12	I	2	118.62
A	12	I	2	111.139
A	12	I	2	98.255
A	12	I	2	101.685
A	12	I	2	103.887
A	12	I	2	125.043
A	12	I	2	139.336
A	12	I	2	146.688
A	12	I	2	92.559
A	12	I	2	111.72
A	12	I	2	76.145
A	12	I	2	105.118
A	12	I	2	58.188
A	12	I	2	125.094
A	12	I	2	109.714
A	12	I	2	139.063
A	12	I	8	389.717
A	12	I	8	459.382
A	12	I	8	263.293
A	12	I	7	262.682
A	12	I	7	266.899
A	12	I	3	243.299
A	12	I	3	319.375
A	12	I	3	216.972
A	12	I	3	168.996
A	12	I	3	163.749
A	12	I	3	163.806
A	12	I	3	97.363
A	12	I	3	142.19
A	12	I	3	178.638
A	12	I	3	189.546
A	12	I	3	147.721
A	12	I	3	181.142
A	12	I	3	198.217
A	12	I	3	89.874
A	12	I	3	181.371
A	12	I	3	154.82
A	12	I	3	76.655
A	12	I	1	79.776
A	12	I	1	84.663
A	12	I	1	54.262
A	12	I	5	387.883
A	12	I	6	115.993
A	13	I	4	118.409
A	13	I	4	174.149
A	13	I	4	157.784
A	13	I	2	155.658
A	13	I	2	148.75
A	13	I	2	129.039
A	13	I	2	110.885
A	13	I	8	324.215
A	13	I	8	330.426
A	13	I	8	365.157
A	13	I	8	403.982
A	13	I	8	385.785
A	13	I	8	344.016
A	13	I	8	323.397
A	13	I	8	393.861
A	13	I	8	291.259
A	13	I	8	338.944
A	13	I	8	329.884
A	13	I	8	231.134
A	13	I	8	107.83
A	13	I	8	345.157
A	13	I	8	318.621
A	13	I	8	318.812
A	13	I	8	255.681
A	13	I	8	174.717
A	13	I	7	286.398
A	13	I	7	157.784
A	13	I	7	121.787
A	13	I	7	119.195
A	13	I	7	164.574
A	13	I	7	190.119
A	13	I	7	170.741
A	13	I	7	314.081
A	13	I	7	252.62
A	13	I	7	138.321
A	13	I	7	170.846
A	13	I	7	294.832
A	13	I	7	291.739
A	13	I	7	257.733
A	13	I	7	233.637
A	13	I	7	127.197
A	13	I	7	166.041
A	13	I	7	133.505
A	13	I	3	208.142
A	13	I	6	85.451
A	13	I	6	271.098
A	13	I	6	285.517
A	13	I	6	347.504
A	13	I	6	300.739
A	13	I	6	232.107
A	13	I	6	306.52
A	13	I	6	251.042
A	13	I	6	295.299
A	13	I	6	92.292
A	13	I	6	182.91
A	13	I	6	327.36
A	13	I	6	329.023
A	13	I	6	122.017
A	14	I	4	134.44
A	14	I	4	129.835
A	14	I	4	112.664
A	14	I	8	336.438
A	14	I	8	472.958
A	14	I	8	434.811
A	14	I	8	259.598
A	14	I	8	267.112
A	14	I	8	152.63
A	14	I	8	333.166
A	14	I	8	353.692
A	14	I	8	253.417
A	14	I	8	256.629
A	14	I	8	276.825
A	14	I	8	304.986
A	14	I	7	176.85
A	14	I	7	149.547
A	14	I	7	273.873
A	14	I	7	282.492
A	14	I	3	232.437
A	14	I	3	213.278
A	14	I	3	79.501
A	14	I	3	175.965
A	14	I	3	86.403
A	14	I	3	162.092
A	14	I	3	149.065
A	14	I	3	218.013
A	14	I	3	62.653
A	14	I	6	365.002
A	14	I	6	308.414
A	15	I	4	220.314
A	15	I	4	90.637
A	15	I	4	169.996
A	15	I	4	108.098
A	15	I	2	190.484
A	15	I	2	98.811
A	15	I	2	85.791
A	15	I	2	98.713
A	15	I	2	96.005
A	15	I	2	68.014
A	15	I	8	79.86
A	15	I	8	62.601
A	15	I	8	46.373
A	15	I	8	74.539
A	15	I	8	69.786
A	15	I	8	50.416
A	15	I	8	54.383
A	15	I	7	271.603
A	15	I	7	194.991
A	15	I	3	145.523
A	15	I	3	93.266
A	15	I	3	160.539
A	15	I	3	131.12
A	15	I	3	150.754
A	15	I	3	92.858
A	15	I	3	72.021
A	15	I	3	57.312
A	15	I	3	102.483
A	15	I	3	82.43
A	15	I	3	63.477
A	15	I	3	74.559
A	15	I	6	256.671
A	15	I	6	86.868
A	16	I	4	202.093
A	16	I	4	263.845
A	16	I	4	274.05
A	16	I	4	284.535
A	16	I	4	289.124
A	16	I	4	135.61
A	16	I	4	83.831
A	16	I	4	110.353
A	16	I	4	121.592
A	16	I	4	127.256
A	16	I	4	124.174
A	16	I	4	135.174
A	16	I	4	211.672
A	16	I	4	114.891
A	16	I	4	146.601
A	16	I	4	215.585
A	16	I	4	223.114
A	16	I	4	187.668
A	16	I	4	114.987
A	16	I	4	154.645
A	16	I	4	223.188
A	16	I	4	183.087
A	16	I	4	212.796
A	16	I	4	243.015
A	16	I	4	215.371
A	16	I	4	161.235
A	16	I	4	163.524
A	16	I	4	155.187
A	16	I	4	158.861
A	16	I	4	96.06
A	16	I	4	121.757
A	16	I	4	112.198
A	16	I	4	150.908
A	16	I	4	164.146
A	16	I	4	128.597
A	16	I	4	109.621
A	16	I	4	117.541
A	16	I	4	159.506
A	16	I	4	102.687
A	16	I	2	215.482
A	16	I	2	138.963
A	16	I	2	140.064
A	16	I	2	122.017
A	16	I	2	105.591
A	16	I	2	91.433
A	16	I	2	107.549
A	16	I	2	114.95
A	16	I	2	112.392
A	16	I	2	88.02
A	16	I	2	97.557
A	16	I	2	98.442
A	16	I	2	135.395
A	16	I	2	116.851
A	16	I	2	107.479
A	16	I	8	354.303
A	16	I	8	294.889
A	16	I	8	219.758
A	16	I	8	86.661
A	16	I	7	220.314
A	16	I	3	231.458
A	16	I	3	215.482
A	16	I	3	237.2
A	16	I	3	190.484
A	16	I	3	166.614
A	16	I	3	193.113
A	16	I	3	175.599
A	16	I	3	148.898
A	16	I	3	70.094
A	16	I	1	66.999
A	16	I	1	56.964
A	16	I	1	65.245
A	16	I	1	111.46
A	16	I	5	316.224
A	16	I	5	336.205
B	17	I	4	278.323
B	17	I	4	242.881
B	17	I	4	239.381
B	17	I	4	248.002
B	17	I	4	188.774
B	17	I	4	201.047
B	17	I	4	209.458
B	17	I	4	172.703
B	17	I	4	195.015
B	17	I	4	211.409
B	17	I	2	254.554
B	17	I	2	142.382
B	17	I	2	122.424
B	17	I	2	273.915
B	17	I	2	185.14
B	17	I	2	190.933
B	17	I	2	177.031
B	17	I	2	129.582
B	17	I	2	192.468
B	17	I	2	194.554
B	17	I	2	119.954
B	17	I	8	417.303
B	17	I	8	300.097
B	17	I	8	190.579
B	17	I	3	254.554
B	17	I	3	215.253
B	17	I	3	220.113
B	17	I	3	224.645
B	17	I	3	192.468
B	17	I	3	196.833
B	17	I	3	185.562
B	17	I	3	191.362
B	17	I	3	138.506
B	17	I	3	84.545
B	17	I	3	142.382
B	17	I	9	696.658
B	17	I	9	273.273
B	18	I	4	173.401
B	18	I	4	223.551
B	18	I	4	218.559
B	18	I	4	238.791
B	18	I	4	156.22
B	18	I	4	189.091
B	18	I	4	89.055
B	18	I	4	105.536
B	18	I	4	110.178
B	18	I	4	127.231
B	18	I	4	66.086
B	18	I	4	107.913
B	18	I	4	134.036
B	18	I	4	134.029
B	18	I	4	215.645
B	18	I	4	165.498
B	18	I	4	71.003
B	18	I	4	103.296
B	18	I	4	140.436
B	18	I	4	124.327
B	18	I	4	90.887
B	18	I	4	137.968
B	18	I	4	172.558
B	18	I	4	127.237
B	18	I	4	74.525
B	18	I	4	78.382
B	18	I	4	110.876
B	18	I	4	147.884
B	18	I	4	242.938
B	18	I	4	196.112
B	18	I	4	169.514
B	18	I	4	120.733
B	18	I	4	167.973
B	18	I	2	207.804
B	18	I	2	82.164
B	18	I	2	121.875
B	18	I	2	140.313
B	18	I	2	123.589
B	18	I	2	141.403
B	18	I	2	141.667
B	18	I	2	195.4
B	18	I	2	141.159
B	18	I	2	126.844
B	18	I	2	153.528
B	18	I	2	106.94
B	18	I	2	67.277
B	18	I	2	129.789
B	18	I	2	120.043
B	18	I	2	91.364
B	18	I	2	103.821
B	18	I	2	116.951
B	18	I	2	89.915
B	18	I	2	93.517
B	18	I	2	130.972
B	18	I	2	68.582
B	18	I	2	74.281
B	18	I	2	49.465
B	18	I	2	64.246
B	18	I	2	109.516
B	18	I	2	121.682
B	18	I	8	301.426
B	18	I	8	356.72
B	18	I	8	240.04
B	18	I	8	222.066
B	18	I	8	183.4
B	18	I	8	179.709
B	18	I	8	206.301
B	18	I	8	45.663
B	18	I	7	195.4
B	18	I	7	268.433
B	18	I	7	209.871
B	18	I	3	216.227
B	18	I	3	208.33
B	18	I	3	211.927
B	18	I	3	207.273
B	18	I	3	207.804
B	18	I	3	134.698
B	18	I	3	187.94
B	18	I	3	138.2
B	18	I	3	172.85
B	18	I	3	167.16
B	18	I	3	91.86
B	18	I	3	73.357
B	18	I	3	144.724
B	18	I	3	204.535
B	18	I	3	163.513
B	18	I	3	80.681
B	18	I	3	94.734
B	18	I	3	30.776
B	18	I	3	55.052
B	18	I	1	134.698
B	19	I	4	93.423
B	19	I	4	214.571
B	19	I	4	207.851
B	19	I	4	245.796
B	19	I	4	170.887
B	19	I	4	197.927
B	19	I	4	192.395
B	19	I	4	163.675
B	19	I	4	85.526
B	19	I	4	160.936
B	19	I	4	122.002
B	19	I	4	70.656
B	19	I	4	172.804
B	19	I	4	113.572
B	19	I	4	83.336
B	19	I	4	192.877
B	19	I	4	205.736
B	19	I	4	221.21
B	19	I	4	125.492
B	19	I	4	151.374
B	19	I	4	166.084
B	19	I	4	145.318
B	19	I	4	103.886
B	19	I	4	101.369
B	19	I	4	211.102
B	19	I	4	130.06
B	19	I	2	141.54
B	19	I	2	87.691
B	19	I	2	105.768
B	19	I	2	149.666
B	19	I	2	94.648
B	19	I	2	100.477
B	19	I	2	108.657
B	19	I	2	103.667
B	19	I	2	103.661
B	19	I	2	69.126
B	19	I	2	89.154
B	19	I	2	124.845
B	19	I	2	110.058
B	19	I	2	60.889
B	19	I	8	236.242
B	19	I	8	192.395
B	19	I	8	241.558
B	19	I	8	236.87
B	19	I	8	187.868
B	19	I	8	191.869
B	19	I	8	108.955
B	19	I	8	160.668
B	19	I	8	232.509
B	19	I	8	46.236
B	19	I	8	75.468
B	19	I	8	91.567
B	19	I	7	375.985
B	19	I	7	287.62
B	19	I	7	170.887
B	19	I	7	266.878
B	19	I	3	197.927
B	19	I	3	207.45
B	19	I	3	138.365
B	19	I	3	163.917
B	19	I	3	165.757
B	19	I	3	137.871
B	19	I	3	94.485
B	19	I	3	152.262
B	19	I	3	112.82
B	19	I	3	218.058
B	19	I	3	55.005
B	19	I	3	90.964
B	19	I	1	144.394
B	19	I	1	61.967
B	20	I	4	202.282
B	20	I	4	224.194
B	20	I	4	213.028
B	20	I	4	199.95
B	20	I	4	90.504
B	20	I	4	124.028
B	20	I	4	140.404
B	20	I	4	170.194
B	20	I	4	99.331
B	20	I	4	81.513
B	20	I	4	127.985
B	20	I	4	139.136
B	20	I	4	121.912
B	20	I	4	112.798
B	20	I	4	155.664
B	20	I	4	126.179
B	20	I	4	114.159
B	20	I	4	128.153
B	20	I	4	181.326
B	20	I	4	150.88
B	20	I	4	131.38
B	20	I	4	151.515
B	20	I	4	126.209
B	20	I	4	129.325
B	20	I	4	117.334
B	20	I	4	114.84
B	20	I	4	175.491
B	20	I	4	171.048
B	20	I	4	95.475
B	20	I	4	159.417
B	20	I	4	133.548
B	20	I	4	103.671
B	20	I	4	134.978
B	20	I	4	117.444
B	20	I	4	124.272
B	20	I	4	173.407
B	20	I	4	92.818
B	20	I	4	139.745
B	20	I	4	121.227
B	20	I	4	108.455
B	20	I	4	128.039
B	20	I	2	157.375
B	20	I	2	155.144
B	20	I	2	148.653
B	20	I	2	140.174
B	20	I	2	190.87
B	20	I	2	75.652
B	20	I	2	97.438
B	20	I	2	81.267
B	20	I	2	92.307
B	20	I	2	64.098
B	20	I	2	57.41
B	20	I	2	91.861
B	20	I	2	116.057
B	20	I	2	93.753
B	20	I	2	106.025
B	20	I	2	99.654
B	20	I	2	70.328
B	20	I	8	338.793
B	20	I	8	419.87
B	20	I	8	405.202
B	20	I	8	150.748
B	20	I	8	135.502
B	20	I	8	314.802
B	20	I	8	287.71
B	20	I	8	277.182
B	20	I	8	110.37
B	20	I	8	146.571
B	20	I	8	61.765
B	20	I	8	54.461
B	20	I	3	209.138
B	20	I	3	213.354
B	20	I	3	193.829
B	20	I	3	234.056
B	20	I	3	186.777
B	20	I	3	190.672
B	20	I	3	240.772
B	20	I	3	223.958
B	20	I	3	225.333
B	20	I	3	190.87
B	20	I	3	85.78
B	20	I	3	128.408
B	20	I	3	90.504
B	20	I	3	171.637
B	20	I	3	73.064
B	20	I	3	159.629
B	20	I	3	123.318
B	20	I	3	94.629
B	20	I	3	147.729
B	20	I	3	183.178
B	20	I	3	149.394
B	20	I	3	181.849
B	20	I	3	151.074
B	20	I	3	159.379
B	20	I	3	185.63
B	20	I	3	163.168
B	20	I	3	171.444
B	20	I	3	108.252
B	20	I	3	190.918
B	20	I	3	99.5
B	20	I	3	118.299
B	20	I	3	160.866
B	20	I	3	65.909
B	20	I	1	118.238
B	20	I	1	117.974
B	20	I	1	101.939
B	20	I	1	86.791
B	20	I	1	104.778
B	20	I	1	67.75
B	20	I	1	97.775
B	20	I	1	54.984
B	20	I	5	304.051
B	20	I	5	354.729
B	20	I	6	132.134
B	21	I	2	125.715
B	21	I	4	81.131
B	21	I	4	80.08
B	21	I	2	155.143
B	21	I	2	143.484
B	21	I	2	153.158
B	21	I	2	93.137
B	21	I	2	118.884
B	21	I	2	59.217
B	21	I	8	313.423
B	21	I	8	273.44
B	21	I	8	329.173
B	21	I	8	320.312
B	21	I	8	311.122
B	21	I	8	361.854
B	21	I	8	359.104
B	21	I	8	279.062
B	21	I	8	357.487
B	21	I	8	289.828
B	21	I	8	110.167
B	21	I	8	111.199
B	21	I	8	89.661
B	21	I	8	130.704
B	21	I	8	115.674
B	21	I	8	89.901
B	21	I	8	58.132
B	21	I	8	112.685
B	21	I	7	390.041
B	21	I	7	387.405
B	21	I	7	155.143
B	21	I	3	246.276
B	21	I	3	140.348
B	21	I	3	225.299
B	21	I	3	125.715
B	21	I	3	119.275
B	21	I	3	116.723
B	21	I	3	95.311
B	21	I	3	95.256
B	21	I	3	105.317
B	21	I	3	81.923
B	21	I	3	90.311
B	21	I	3	107.966
B	21	I	3	66.051
B	21	I	9	560.628
B	21	I	1	68.226
B	21	I	1	65.012
B	21	I	1	56.882
B	21	I	6	322.275
B	21	I	6	297.456
B	21	I	6	322.999
B	21	I	6	285.595
B	21	I	6	310.64
B	21	I	6	335.86
B	21	I	6	131.322
B	21	I	6	337.33
B	21	I	6	303.014
B	22	I	4	259
B	22	I	4	102.042
B	22	I	4	92.898
B	22	I	4	80.99
B	22	I	4	132.695
B	22	I	4	89.069
B	22	I	4	80.039
B	22	I	4	180.18
B	22	I	4	160.374
B	22	I	4	94.112
B	22	I	2	86.52
B	22	I	2	149.214
B	22	I	2	127.684
B	22	I	2	164.289
B	22	I	2	174.707
B	22	I	2	100.158
B	22	I	2	124.976
B	22	I	2	103.322
B	22	I	2	91.958
B	22	I	2	97.625
B	22	I	2	133.401
B	22	I	2	107.947
B	22	I	2	85.856
B	22	I	2	74.926
B	22	I	2	92.499
B	22	I	2	118.08
B	22	I	2	81.988
B	22	I	2	107.556
B	22	I	2	91.04
B	22	I	2	89.311
B	22	I	2	103.844
B	22	I	2	138.51
B	22	I	2	91.887
B	22	I	8	100.158
B	22	I	8	114.423
B	22	I	8	166.603
B	22	I	8	94.508
B	22	I	8	86.487
B	22	I	8	88.796
B	22	I	8	224.426
B	22	I	8	186.882
B	22	I	8	236.195
B	22	I	8	160.114
B	22	I	8	70.528
B	22	I	8	61.072
B	22	I	7	350.363
B	22	I	7	269.725
B	22	I	7	272.922
B	22	I	7	347.165
B	22	I	7	122.671
B	22	I	7	213.329
B	22	I	7	153.313
B	22	I	7	121.032
B	22	I	7	71.141
B	22	I	7	118.46
B	22	I	7	131.715
B	22	I	7	149.65
B	22	I	7	159.875
B	22	I	7	248.289
B	22	I	3	224.832
B	22	I	3	171.951
B	22	I	3	97.625
B	22	I	3	91.7
B	22	I	3	104.546
B	22	I	3	59.854
B	22	I	3	142.849
B	22	I	3	114.461
B	22	I	3	90.629
B	22	I	1	62.355
B	23	I	4	87.227
B	23	I	4	242.251
B	23	I	4	64.525
B	23	I	4	145.152
B	23	I	4	102.843
B	23	I	4	147.076
B	23	I	4	146.389
B	23	I	4	76.923
B	23	I	4	98.094
B	23	I	4	102.887
B	23	I	4	90.255
B	23	I	4	71.206
B	23	I	4	192.147
B	23	I	4	82.553
B	23	I	4	83.4
B	23	I	4	74.001
B	23	I	4	135.517
B	23	I	4	89.266
B	23	I	4	63.183
B	23	I	4	85.229
B	23	I	2	142.317
B	23	I	2	165.252
B	23	I	2	135.893
B	23	I	2	156.414
B	23	I	2	114.412
B	23	I	2	136.347
B	23	I	2	133.34
B	23	I	2	89.456
B	23	I	2	60.94
B	23	I	2	62.223
B	23	I	2	65.479
B	23	I	2	82.023
B	23	I	2	70.69
B	23	I	2	101.402
B	23	I	2	70.551
B	23	I	2	101.183
B	23	I	2	97.236
B	23	I	2	76.153
B	23	I	2	160.504
B	23	I	2	85.495
B	23	I	2	106.042
B	23	I	2	137.5
B	23	I	2	100.406
B	23	I	2	104.287
B	23	I	2	101.64
B	23	I	2	98.454
B	23	I	2	86.629
B	23	I	2	60.874
B	23	I	2	104.968
B	23	I	2	87.674
B	23	I	2	119.744
B	23	I	2	106.209
B	23	I	2	66.413
B	23	I	2	90.785
B	23	I	2	59.609
B	23	I	2	103.447
B	23	I	2	121.677
B	23	I	2	68.631
B	23	I	2	54.417
B	23	I	2	119.091
B	23	I	2	118.616
B	23	I	2	82.355
B	23	I	2	118.312
B	23	I	2	100.559
B	23	I	2	102.886
B	23	I	2	95.741
B	23	I	2	124.847
B	23	I	2	111.283
B	23	I	2	104.377
B	23	I	2	87.305
B	23	I	2	60.2
B	23	I	8	258.534
B	23	I	8	332.905
B	23	I	8	439.377
B	23	I	8	349.144
B	23	I	8	324.34
B	23	I	8	343.104
B	23	I	8	392.092
B	23	I	8	311.465
B	23	I	8	426.28
B	23	I	8	425.959
B	23	I	8	346.319
B	23	I	8	356.643
B	23	I	8	403.62
B	23	I	8	404.724
B	23	I	8	350.392
B	23	I	8	409.162
B	23	I	8	395.038
B	23	I	8	122.455
B	23	I	8	217.683
B	23	I	8	277.462
B	23	I	8	278.382
B	23	I	8	252.554
B	23	I	8	119.636
B	23	I	8	241.383
B	23	I	8	176.706
B	23	I	8	149.385
B	23	I	8	99.49
B	23	I	8	256.74
B	23	I	8	239.687
B	23	I	8	168.9
B	23	I	8	138.074
B	23	I	8	99.717
B	23	I	8	101.402
B	23	I	8	94.03
B	23	I	8	79.029
B	23	I	8	67.184
B	23	I	8	61.937
B	23	I	7	324.242
B	23	I	7	333.692
B	23	I	7	89.456
B	23	I	7	82.011
B	23	I	7	242.114
B	23	I	7	80.001
B	23	I	7	255.474
B	23	I	7	185.334
B	23	I	7	105.28
B	23	I	3	235.977
B	23	I	3	247.487
B	23	I	3	238.361
B	23	I	3	224.375
B	23	I	3	141.199
B	23	I	3	149.453
B	23	I	3	93.623
B	23	I	3	195.255
B	23	I	3	145.152
B	23	I	3	97.236
B	23	I	3	146.389
B	23	I	3	78.69
B	23	I	3	94.72
B	23	I	3	201.979
B	23	I	3	109.669
B	23	I	3	200.143
B	23	I	3	170.853
B	23	I	3	158.905
B	23	I	3	212.655
B	23	I	3	144.827
B	23	I	3	151.95
B	23	I	3	87.124
B	23	I	3	239.077
B	23	I	3	70.551
B	23	I	3	92.502
B	23	I	3	107.761
B	23	I	3	83.336
B	23	I	3	38.157
B	23	I	3	94.482
B	23	I	3	177.018
B	23	I	3	76.583
B	23	I	3	60.484
B	23	I	3	50.513
B	23	I	1	58.743
B	23	I	1	101.233
B	23	I	1	101.185
B	23	I	1	96.12
B	23	I	1	54.324
B	23	I	1	48.242
B	23	I	1	94.373
B	23	I	1	62.371
B	23	I	1	73.979
B	23	I	5	413.964
B	23	I	5	345.547
B	23	I	6	342.651
B	23	I	6	278.303
B	23	I	6	384.817
B	24	I	4	125.772
B	24	I	4	223.785
B	24	I	4	231.545
B	24	I	4	248.523
B	24	I	4	140.751
B	24	I	4	124.676
B	24	I	4	225.909
B	24	I	4	186.796
B	24	I	4	179.53
B	24	I	4	134.474
B	24	I	4	134.396
B	24	I	4	152.011
B	24	I	4	169.927
B	24	I	4	176.244
B	24	I	4	157.312
B	24	I	4	143.293
B	24	I	4	184.027
B	24	I	4	200.047
B	24	I	4	157.944
B	24	I	4	103.629
B	24	I	2	144.132
B	24	I	2	148.812
B	24	I	2	146.116
B	24	I	2	184.026
B	24	I	2	181.483
B	24	I	2	164.267
B	24	I	2	89.557
B	24	I	2	105.198
B	24	I	2	119.747
B	24	I	2	73.615
B	24	I	2	102.034
B	24	I	2	117.366
B	24	I	2	143.649
B	24	I	2	93.667
B	24	I	2	52.094
B	24	I	2	114.592
B	24	I	2	125.153
B	24	I	2	99.115
B	24	I	2	53.733
B	24	I	2	69.483
B	24	I	2	100.854
B	24	I	2	108.809
B	24	I	2	76.096
B	24	I	2	99.506
B	24	I	2	106.691
B	24	I	8	383.315
B	24	I	8	434.015
B	24	I	8	356.241
B	24	I	8	246.725
B	24	I	8	189.257
B	24	I	8	73.758
B	24	I	7	153.337
B	24	I	3	207.305
B	24	I	3	197.444
B	24	I	3	193.896
B	24	I	3	232.034
B	24	I	3	214.686
B	24	I	3	204.938
B	24	I	3	203.124
B	24	I	3	184.026
B	24	I	3	84.829
B	24	I	3	95.533
B	24	I	3	141.961
B	24	I	3	164.918
B	24	I	3	180.365
B	24	I	3	203.13
B	24	I	3	196.485
B	24	I	3	181.609
B	24	I	3	143.051
B	24	I	3	177.39
B	24	I	3	117.035
B	24	I	3	166.609
B	24	I	3	133.194
B	24	I	3	97.243
B	24	I	3	187.44
B	24	I	3	86.53
B	24	I	3	31.564
B	24	I	3	59.975
B	24	I	3	48.899
B	24	I	1	79.06
B	24	I	1	98.807
B	24	I	1	39.548
B	24	I	1	70.932
B	24	I	1	74.954
B	24	I	1	74.017
B	24	I	1	33.586
B	24	I	1	87.422
B	24	I	1	99.746
B	24	I	1	65.965
B	24	I	1	44.131
B	24	I	1	56.28
B	25	I	4	265.44
B	25	I	4	113.801
B	25	I	4	103.754
B	25	I	4	167.196
B	25	I	4	124.111
B	25	I	4	180.823
B	25	I	4	122.631
B	25	I	4	139.103
B	25	I	4	155.448
B	25	I	4	145.881
B	25	I	4	163.288
B	25	I	4	171.52
B	25	I	4	136.418
B	25	I	4	176.001
B	25	I	4	180.971
B	25	I	4	95.91
B	25	I	4	95.032
B	25	I	2	143.009
B	25	I	2	156.903
B	25	I	2	132.381
B	25	I	2	100.366
B	25	I	2	136.636
B	25	I	2	89.795
B	25	I	2	99.182
B	25	I	2	76.476
B	25	I	2	101.824
B	25	I	2	104.727
B	25	I	2	138.144
B	25	I	2	123.685
B	25	I	2	116.06
B	25	I	2	111.945
B	25	I	2	114.655
B	25	I	2	93.79
B	25	I	2	106.088
B	25	I	2	141.264
B	25	I	2	122.68
B	25	I	2	103.638
B	25	I	2	114.494
B	25	I	8	417.018
B	25	I	8	395.273
B	25	I	8	386.459
B	25	I	8	422.241
B	25	I	8	255.027
B	25	I	8	273.652
B	25	I	8	276.842
B	25	I	8	264.47
B	25	I	8	273.343
B	25	I	8	204.661
B	25	I	8	303.714
B	25	I	8	271.856
B	25	I	8	241.607
B	25	I	8	113.801
B	25	I	7	187.575
B	25	I	7	157.467
B	25	I	7	156.417
B	25	I	3	219.722
B	25	I	3	233.541
B	25	I	3	242.014
B	25	I	3	113.227
B	25	I	3	219.309
B	25	I	3	160.099
B	25	I	3	225.501
B	25	I	3	178.296
B	25	I	3	114.113
B	25	I	3	167.264
B	25	I	3	102.831
B	25	I	3	77
B	26	I	4	254.817
B	26	I	2	156.326
B	26	I	2	190.884
B	26	I	2	158.754
B	26	I	2	162.469
B	26	I	2	151.971
B	26	I	2	155.065
B	26	I	2	152.718
B	26	I	2	202.368
B	26	I	2	149.345
B	26	I	2	170.934
B	26	I	2	114.307
B	26	I	2	104.964
B	26	I	2	106.977
B	26	I	2	118.041
B	26	I	2	116.583
B	26	I	2	118.427
B	26	I	2	122.519
B	26	I	2	129.327
B	26	I	2	124.388
B	26	I	2	105.494
B	26	I	2	126.668
B	26	I	2	115.043
B	26	I	2	112.203
B	26	I	2	109.644
B	26	I	8	360.819
B	26	I	8	428.163
B	26	I	8	441.456
B	26	I	8	352.8
B	26	I	8	310.322
B	26	I	8	388.875
B	26	I	8	234.547
B	26	I	8	361.622
B	26	I	8	143.87
B	26	I	8	326.243
B	26	I	8	202.368
B	26	I	8	149.345
B	26	I	8	254.817
B	26	I	8	217.713
B	26	I	8	272.313
B	26	I	8	221.033
B	26	I	8	214.829
B	26	I	8	241.126
B	26	I	8	89.872
B	26	I	8	93.152
B	26	I	8	84.321
B	26	I	8	79.648
B	26	I	8	99.435
B	26	I	8	82.584
B	26	I	8	75.613
B	26	I	7	358.304
B	26	I	7	361.881
B	26	I	7	220.353
B	26	I	7	349.798
B	26	I	7	306.285
B	26	I	7	217.628
B	26	I	7	273.636
B	26	I	3	260.944
B	26	I	3	170.934
B	26	I	3	74.643
B	26	I	3	132.566
B	26	I	3	121.59
B	26	I	3	80.613
B	26	I	3	200.446
B	26	I	3	95.263
B	26	I	3	92.701
B	26	I	3	147.947
B	26	I	3	96.651
B	26	I	3	39.265
B	26	I	6	309.584
B	26	I	6	255.9
B	26	I	6	253.09
B	26	I	6	277.694
B	26	I	6	358.256
B	27	I	2	101.187
B	27	I	4	229.119
B	27	I	4	81.622
B	27	I	2	149.698
B	27	I	2	116.438
B	27	I	2	155.342
B	27	I	2	177.199
B	27	I	2	159.536
B	27	I	2	155.506
B	27	I	2	151.223
B	27	I	2	172.568
B	27	I	2	85.017
B	27	I	2	143.906
B	27	I	2	152.95
B	27	I	2	117.489
B	27	I	2	96.163
B	27	I	2	131.41
B	27	I	2	159.678
B	27	I	2	185.033
B	27	I	2	181.017
B	27	I	2	108.293
B	27	I	2	121.904
B	27	I	2	120.308
B	27	I	2	132.24
B	27	I	2	106.745
B	27	I	2	104.452
B	27	I	2	109.118
B	27	I	2	127.311
B	27	I	2	102.957
B	27	I	2	106.866
B	27	I	2	110.564
B	27	I	2	134.977
B	27	I	2	126.221
B	27	I	2	111.482
B	27	I	2	126.895
B	27	I	2	123.325
B	27	I	2	121.475
B	27	I	2	99.86
B	27	I	2	110.526
B	27	I	2	111.432
B	27	I	2	93.497
B	27	I	2	127.066
B	27	I	2	105.1
B	27	I	2	129.864
B	27	I	2	136.943
B	27	I	2	94.632
B	27	I	2	116.133
B	27	I	2	121.393
B	27	I	2	120.034
B	27	I	2	114.905
B	27	I	2	117.608
B	27	I	2	98.149
B	27	I	8	373.395
B	27	I	8	414.402
B	27	I	8	431.695
B	27	I	8	113.95
B	27	I	8	220.621
B	27	I	8	236.321
B	27	I	8	170.453
B	27	I	8	315.691
B	27	I	8	263.979
B	27	I	8	365.302
B	27	I	8	112.558
B	27	I	8	243.903
B	27	I	8	281.783
B	27	I	8	148.543
B	27	I	8	247.092
B	27	I	8	313.808
B	27	I	8	174.232
B	27	I	8	157.138
B	27	I	8	223.048
B	27	I	8	83.513
B	27	I	7	315.027
B	27	I	7	302.106
B	27	I	7	393.747
B	27	I	7	346.704
B	27	I	7	149.698
B	27	I	7	221.089
B	27	I	7	235.053
B	27	I	7	214.056
B	27	I	7	242.512
B	27	I	7	209.267
B	27	I	7	75.422
B	27	I	7	247.493
B	27	I	7	199.687
B	27	I	7	211.824
B	27	I	7	180.859
B	27	I	3	232.187
B	27	I	3	229.214
B	27	I	3	235.219
B	27	I	3	220.372
B	27	I	3	143.906
B	27	I	3	185.033
B	27	I	3	181.017
B	27	I	3	148.944
B	27	I	3	157.277
B	27	I	3	115.564
B	27	I	3	189.632
B	27	I	3	139.299
B	27	I	3	90.596
B	27	I	3	85.017
B	27	I	3	108.39
B	27	I	3	80.468
B	27	I	3	96.219
B	27	I	6	344.847
B	28	I	4	279.972
B	28	I	4	252.29
B	28	I	4	256.998
B	28	I	4	26.456
B	28	I	4	81.727
B	28	I	2	159.396
B	28	I	2	159.872
B	28	I	2	160.38
B	28	I	2	151.332
B	28	I	2	170.107
B	28	I	2	157.523
B	28	I	2	209.561
B	28	I	2	112.764
B	28	I	2	97.269
B	28	I	2	84.072
B	28	I	2	76.583
B	28	I	2	41.497
B	28	I	2	55.299
B	28	I	2	32.845
B	28	I	2	64.253
B	28	I	2	96.149
B	28	I	2	181.134
B	28	I	2	64.422
B	28	I	2	51.799
B	28	I	2	85.846
B	28	I	2	100.634
B	28	I	2	68.952
B	28	I	2	101.138
B	28	I	2	108.259
B	28	I	2	90.632
B	28	I	2	104.751
B	28	I	2	106.172
B	28	I	2	67.425
B	28	I	2	109.678
B	28	I	2	119.256
B	28	I	2	110.267
B	28	I	2	104.965
B	28	I	2	123.214
B	28	I	2	66.959
B	28	I	2	113.154
B	28	I	2	98.841
B	28	I	2	76.21
B	28	I	2	76.739
B	28	I	2	69.687
B	28	I	2	94.514
B	28	I	2	101.697
B	28	I	2	84
B	28	I	2	57.447
B	28	I	2	42.666
B	28	I	2	28.109
B	28	I	2	109.747
B	28	I	2	100.511
B	28	I	2	125.916
B	28	I	2	99.051
B	28	I	2	99.404
B	28	I	2	109.535
B	28	I	2	84.085
B	28	I	2	82.802
B	28	I	2	77.615
B	28	I	2	60.129
B	28	I	2	85.063
B	28	I	2	85.437
B	28	I	2	78.157
B	28	I	2	99.671
B	28	I	2	91.719
B	28	I	2	61.094
B	28	I	2	131.601
B	28	I	2	104.235
B	28	I	2	97.336
B	28	I	2	149.778
B	28	I	2	104.696
B	28	I	8	204.702
B	28	I	8	135.078
B	28	I	8	223.626
B	28	I	8	294.968
B	28	I	8	140.518
B	28	I	8	301.982
B	28	I	8	80.15
B	28	I	8	84.072
B	28	I	8	44.132
B	28	I	3	209.561
B	28	I	3	227.26
B	28	I	3	181.134
B	28	I	3	133.124
B	28	I	3	137.958
B	28	I	3	146.667
B	28	I	3	129.353
B	28	I	3	31.478
B	28	I	3	32.845
B	28	I	3	26.456
B	28	I	3	83.199
B	28	I	3	62.469
B	28	I	3	45.938
B	28	I	3	87.054
B	28	I	3	53.011
B	28	I	3	43.894
B	28	I	3	39.941
B	28	I	3	83.726
B	28	I	3	44.262
B	28	I	3	27.525
B	28	I	3	56.749
B	28	I	3	48.987
B	28	I	3	35.064
B	28	I	3	56.404
B	28	I	3	53.688
B	28	I	3	33.54
B	28	I	1	63.021
B	28	I	1	31.478
B	28	I	1	60.405
B	28	I	1	34.653
B	28	I	1	77.572
B	29	I	4	114.979
B	29	I	4	186.798
B	29	I	4	109.021
B	29	I	2	173.513
B	29	I	2	157.934
B	29	I	2	143.896
B	29	I	2	106.275
B	29	I	2	96.759
B	29	I	2	147.693
B	29	I	2	143.914
B	29	I	2	212.632
B	29	I	2	105.296
B	29	I	2	118.021
B	29	I	2	107.887
B	29	I	2	90.722
B	29	I	2	129.601
B	29	I	2	103.867
B	29	I	2	85.72
B	29	I	2	61.945
B	29	I	2	41.897
B	29	I	2	122.36
[truncated: 6,709 more rows]

## Sheet: Abun
YEAR	LOCALITY	STATION	sp11	sp10	sp9	sp2	sp4	sp7	sp1	sp2	sp5	sp6	sp8
I	A	1	0	0	0	36	6	4	0	25	0	0	18
I	A	2	0	0	0	30	1	1	4	18	0	0	16
I	A	3	0	0	0	0	4	10	0	5	0	5	18
I	A	4	0	0	0	14	2	4	0	20	0	2	13
I	A	5	0	0	0	3	4	0	0	7	1	1	3
I	A	6	0	0	0	12	3	0	3	10	0	0	13
I	A	7	0	0	0	4	19	0	1	14	0	0	1
I	A	8	0	0	0	6	12	1	1	11	0	0	2
I	A	9	0	0	0	12	3	13	5	23	0	0	49
I	A	10	4	0	0	11	5	3	4	28	0	0	25
I	A	11	0	0	0	4	29	3	1	24	2	0	14
I	A	12	0	0	0	29	28	2	3	17	1	1	3
I	A	13	0	0	0	4	3	18	0	1	0	14	18
I	A	14	0	0	0	0	3	4	0	9	0	2	12
I	A	15	0	0	0	6	4	2	0	12	0	2	7
I	A	16	0	0	0	15	39	1	4	9	2	0	4
I	B	17	2	0	0	11	10	0	0	11	0	0	3
I	B	18	0	0	0	27	33	3	1	19	0	0	8
I	B	19	0	0	0	14	26	4	2	12	0	0	12
I	B	20	0	0	0	17	41	0	8	33	2	1	12
I	B	21	1	0	0	7	2	3	3	13	0	9	18
I	B	22	0	0	0	23	10	14	1	9	0	0	12
I	B	23	0	0	0	51	20	9	9	33	2	3	37
I	B	24	0	0	0	25	20	1	12	27	0	0	6
I	B	25	0	0	0	21	17	3	0	12	0	0	14
I	B	26	0	0	0	24	1	7	0	12	0	5	25
I	B	27	0	0	0	50	2	15	0	17	0	1	20
I	B	28	0	0	0	66	5	0	5	26	0	0	9
I	B	29	0	0	0	34	3	4	0	22	0	0	8
I	B	30	0	0	0	31	18	13	0	17	1	0	10
I	B	31	0	0	0	37	61	0	1	23	0	0	1
I	B	32	0	0	0	3	0	1	0	3	0	0	8
I	C	33	0	0	0	28	31	0	1	32	0	0	5
I	C	34	0	0	0	15	16	4	0	15	0	0	4
I	C	35	0	0	0	51	44	4	2	24	2	1	6
I	C	36	0	0	0	59	0	3	6	27	1	1	25
I	C	37	2	0	0	14	6	0	0	5	0	0	2
I	C	38	0	0	0	43	8	8	0	11	0	0	4
I	C	39	0	0	0	45	4	0	2	26	1	0	1
I	C	40	0	0	0	40	55	8	0	19	1	4	4
I	C	41	0	0	0	37	43	20	1	15	1	1	6
I	C	42	0	0	0	4	47	0	11	20	1	0	13
I	C	43	0	0	0	20	51	1	3	29	0	0	10
I	C	44	0	0	0	44	76	4	4	26	1	0	17
I	C	45	0	0	0	22	52	2	4	17	1	0	6
I	C	46	0	0	0	8	41	2	10	33	0	0	11
I	C	47	0	0	0	20	36	0	1	14	0	0	11
I	C	48	0	0	0	34	33	3	3	39	0	0	15
I	D	49	0	0	0	12	8	5	3	10	0	0	15
I	D	50	4	1	0	21	28	7	9	40	3	1	21
I	D	51	0	0	0	19	2	3	0	27	0	0	10
I	D	52	0	0	0	24	15	7	5	31	0	0	13
I	D	53	1	3	0	1	27	1	2	21	0	0	22
I	D	54	0	0	0	27	14	2	2	14	1	0	24
I	D	55	0	0	0	18	11	4	7	20	0	0	30
I	D	56	0	0	0	20	10	1	1	25	0	0	18
I	D	57	2	0	0	45	25	0	1	15	0	0	17
I	D	58	0	0	0	25	1	0	0	13	16	1	6
I	D	59	0	2	0	18	46	0	0	23	0	0	11
I	D	60	2	0	0	49	38	4	7	29	1	6	23
I	D	61	0	0	0	15	20	6	1	37	2	0	29
I	D	62	0	3	2	22	8	11	0	7	6	0	13
I	D	63	0	0	0	24	31	0	4	22	0	0	11
I	D	64	1	0	0	43	27	4	3	30	0	0	9
II	D	65	5	0	0	5	1	31	0	4	0	23	16
II	D	66	8	0	5	33	1	42	1	11	7	60	16
II	D	67	0	0	0	0	0	2	0	1	0	12	9
II	D	68	0	0	0	7	0	1	0	11	2	1	15
II	D	69	1	0	0	31	0	8	1	30	3	1	22
II	D	70	0	0	0	19	0	5	0	21	2	5	20
II	D	71	0	0	0	5	1	1	2	25	15	1	6
II	D	72	0	0	0	12	0	34	0	3	0	30	20
II	D	73	0	0	0	39	2	9	0	22	0	0	17
II	D	74	5	2	0	20	4	0	0	18	1	1	11
II	D	75	0	0	0	6	0	0	0	15	35	3	4
II	D	76	9	3	4	44	1	12	2	24	31	14	15
II	D	77	0	0	9	24	5	1	0	6	0	0	8
II	D	78	1	0	0	14	20	0	1	15	3	0	10
II	D	79	2	0	0	3	6	0	0	8	0	0	1
II	D	80	0	0	2	16	2	7	0	19	19	2	10
II	C	81	0	0	0	19	72	4	0	36	0	0	9
II	C	82	0	0	0	29	47	4	0	33	0	0	20
II	C	83	0	0	0	16	63	6	0	22	0	0	8
II	C	84	0	0	0	5	63	5	2	52	0	0	19
II	C	85	0	0	8	50	3	0	0	12	11	1	12
II	C	86	0	0	0	19	1	0	0	9	22	0	2
II	C	87	0	0	0	30	78	11	0	31	6	0	25
II	C	88	0	0	1	54	106	22	1	28	0	1	29
II	C	89	0	0	0	10	1	8	3	2	4	23	5
II	C	90	22	0	8	8	27	8	0	17	9	25	9
II	C	91	0	0	0	65	13	0	0	26	4	0	6
II	C	92	0	0	0	17	2	11	2	26	16	1	14
II	C	93	0	0	0	42	32	9	4	47	0	0	30
II	C	94	0	0	6	59	25	43	0	46	12	2	52
II	C	95	0	0	0	8	18	19	0	18	1	2	14
II	C	96	0	1	0	8	79	3	1	18	0	0	20
