# Supplementary material for: Spatial variation of parrotfish assemblages at oceanic islands in the western Caribbean: evidence of indirect effects of fishing?
Source: PeerJ journal article supplement (doi:10.7717/peerj.14178), 2022-11-28
Supplement: Table_S1.pdf [file Table_S1.pdf]

**Table S1. Video-stations surveyed.** Year, location and depth (m) range per station. Stations were located in coral reefs bottoms and some nearby seagrass meadows (\*).

| Year | Locality           | Station | Latitude    | Longitude    | Depth (m)   |       |
|------|--------------------|---------|-------------|--------------|-------------|-------|
| 2018 | Bolívar<br>(BOL)   | 1       | 12.39201    | -81.46647    | 8-15        |       |
|      |                    | 2       | 12.39619    | -81.47939    | 15-30       |       |
|      |                    | 3       | 12.41922    | -81.47945    | 8-15        |       |
|      |                    | 4       | 12.4348     | -81.49897    | 15-30       |       |
|      |                    | 5       | 12.41774    | -81.47878    | 3-8         |       |
|      |                    | 6       | 12.39331    | -81.45147    | 8-15        |       |
|      |                    | 7       | 12.41336    | -81.47147    | 8-15        |       |
|      |                    | 8       | 12.44653    | -81.49506    | 15-30       |       |
|      |                    | 9       | 12.38563    | -81.45908    | 15-30       |       |
|      |                    | 10      | 12.38937    | -81.45805    | 3-8         |       |
|      |                    | 11      | 12.39575    | -81.46768    | 3-8         |       |
|      |                    | 12      | 12.41169    | -81.48862    | 15-30       |       |
|      |                    | 13      | 12.39856    | -81.47815    | 3-8         |       |
|      |                    | 14      | 12.40249    | -81.48354    | 8-15        |       |
|      |                    | 15      | 12.41905    | -81.49595    | 15-30       |       |
|      |                    | 16      | 12.45195    | -81.4883     | 3-8         |       |
|      | San Andrés<br>(SA) | 1       | 12.595958   | -81.718196   | 15-30       |       |
|      |                    | 2       | 12.594199   | -81.690987   | 3-8         |       |
|      |                    | 3       | 12.49833564 | -81.71440905 | 15-30       |       |
|      |                    | 4       | 12.54725372 | -81.6856643  | 3-8         |       |
|      |                    | 5       | 12.5444987  | -81.690854   | 15-30       |       |
|      |                    | 6       | 12.525167   | -81.74137    | 8-15        |       |
|      |                    | 7       | 12.54449873 | -81.690854   | 3-8         |       |
|      |                    | 8       | 12.528351   | -81.738108   | 8-15        |       |
|      |                    | 9       | 12.502166   | -81.737508   | 3-8         |       |
|      |                    | 10      | 12.561211   | -81.743368   | 8-15        |       |
|      |                    | 11      | 12.532223   | -81.694101   | 8-15        |       |
|      |                    | 12      | 12.585002   | -81.727575   | 8-15        |       |
|      |                    | 13      | 12.596227   | -81.712812   | 15-30       |       |
|      |                    | 14      | 12.501147   | -81.73847    | 15-30       |       |
|      |                    | 15      | 12.49461    | -81.74465    | 8-15        |       |
|      |                    | 16      | 12.52477    | -81.734179   | 3-8         |       |
|      |                    |         | 1           | 12.1638861   | -81.8586056 | 8-15  |
|      |                    |         | 2           | 12.1547194   | -81.8483306 | 8-15  |
|      |                    |         | 3           | 12.1958278   | -81.8613861 | 3-8   |
|      |                    |         | 4           | 12.1861111   | -81.8605528 | 3-8   |
|      |                    |         | 5           | 12.1372167   | -81.8338889 | 8-15  |
|      |                    |         | 6           | 12.17555     | -81.8486111 | 15-30 |
|      |                    |         | 7           | 12.1397194   | -81.8638889 | 15-30 |

|      |                      |                      |             |             |            |       |
|------|----------------------|----------------------|-------------|-------------|------------|-------|
| 2019 | Albuquerque<br>(ALB) | 8                    | 12.16788    | -81.86505   | 3-8        |       |
|      |                      | 9                    | 12.16297    | -81.84648   | 3-8        |       |
|      |                      | 10                   | 12.1377722  | -81.8711083 | 8-15       |       |
|      |                      | 11                   | 12.18838833 | -81.8833306 | 15-30      |       |
|      |                      | 12                   | 12.1649972  | -81.8958306 | 15-30      |       |
|      |                      | 13                   | 12.1436083  | -81.8369417 | 8-15       |       |
|      |                      | 14                   | 12.1647194  | -81.8266667 | 15-30      |       |
|      |                      | 15                   | 12.1525     | -81.89223   | 3-8        |       |
|      |                      | 16                   | 12.14083    | -81.82389   | 15-30      |       |
|      |                      | Providencia<br>(PRO) | 1           | 13.318977   | -81.372128 | 8-15  |
|      |                      |                      | 2           | 13.31263    | -81.377107 | 8-15  |
|      |                      |                      | 3           | 13.3143     | -81.386891 | 3-8   |
|      |                      |                      | 4           | 13.314634   | -81.413499 | 3-8   |
|      |                      |                      | 5           | 13.326494   | -81.423455 | 8-15  |
|      |                      |                      | 6           | 13.334178   | -81.412812 | 15-30 |
|      |                      |                      | 7           | 13.34921    | -81.412984 | 15-30 |
|      | 8                    |                      | 13.358731   | -81.403542  | 8-15       |       |
|      | 9                    |                      | 13.3662906  | -81.413327  | 15-30      |       |
|      | 10                   |                      | 13.374931   | -81.412125  | 8-15       |       |
|      | 11                   |                      | 13.379941   | -81.410752  | 15-30      |       |
|      | 12                   |                      | 13.387456   | -81.400967  | 3-8        |       |
|      | 13                   |                      | 13.393968   | -81.393414  | 3-8        |       |
|      | 14                   |                      | 13.393968   | -81.351014  | 3-8        |       |
|      | 15                   |                      | 13.403821   | -81.378651  | 15-30      |       |
|      | 16                   |                      | 13.397141   | -81.381913  | 15-30      |       |
|      | San Andrés<br>(SA)   | 1                    | 12.502166   | -81.737508  | 8-15       |       |
|      |                      | 2                    | 12.501147   | -81.73847   | 8-15       |       |
|      |                      | 3                    | 12.561211   | -81.743368  | 8-15       |       |
|      |                      | 4                    | 12.49461    | -81.74465   | 8-15       |       |
|      |                      | 5                    | 12.562823   | -81.700205  | 3-8*       |       |
|      |                      | 6                    | 12.559254   | -81.700737  | 3-8*       |       |
|      |                      | 7                    | 12.1649972  | -81.8958306 | 15-30      |       |
| 8    |                      | 12.1397194           | -81.8638889 | 15-30       |            |       |
| 9    |                      | 12.56185             | -81.696415  | 3-8*        |            |       |
| 10   |                      | 12.567172            | -81.727137  | 3-8*        |            |       |
| 11   |                      | 12.595958            | -81.718196  | 15-30       |            |       |
| 12   |                      | 12.16788             | -81.86505   | 3-8         |            |       |
| 13   |                      | 12.532223            | -81.694101  | 8-15        |            |       |
| 14   |                      | 13.3143              | -81.386891  | 3-8         |            |       |
| 15   |                      | 13.314634            | -81.413499  | 3-8         |            |       |
| 16   |                      | 12.5444987           | -81.690854  | 15-30       |            |       |
|      |                      | 1                    | 13.314634   | -81.413499  | 3-8        |       |
|      |                      | 2                    | 13.374931   | -81.412125  | 8-15       |       |
|      |                      | 3                    | 13.3143     | -81.386891  | 3-8        |       |

|  |             |    |            |            |       |
|--|-------------|----|------------|------------|-------|
|  |             | 4  | 13.318977  | -81.372128 | 8-15  |
|  |             | 5  | 13.3662906 | -81.413327 | 15-30 |
|  |             | 6  | 13.38186   | -81.378145 | 3-8*  |
|  |             | 7  | 13.31263   | -81.377107 | 8-15  |
|  | Providencia | 8  | 13.381526  | -81.373853 | 3-8*  |
|  | (PRO)       | 9  | 13.334178  | -81.412812 | 15-30 |
|  |             | 10 | 13.375347  | -81.353425 | 3-8*  |
|  |             | 11 | 13.326494  | -81.423455 | 8-15  |
|  |             | 12 | 13.358731  | -81.403542 | 8-15  |
|  |             | 13 | 13.387456  | -81.400967 | 3-8   |
|  |             | 14 | 13.403821  | -81.378651 | 15-30 |
|  |             | 15 | 13.393968  | -81.351014 | 3-8   |
|  |             | 16 | 13.397141  | -81.381913 | 15-30 |
