# Supplementary material for: Spatial variation of parrotfish assemblages at oceanic islands in the western Caribbean: evidence of indirect effects of fishing?
Source: PeerJ journal article supplement (doi:10.7717/peerj.14178), 2022-11-28
Supplement: Table_S2_NEW.pdf [file Table_S2_NEW.pdf]

**Table S2. Mixed effects models applied on body-size data.** (A) Data set with Sex, Species and Locality as fixed factors. (B) Data set with Sex and Locality as fixed factors. (C) Data set with Sex, Species, Locality and Year as fixed factors. (D) Data with Species, Locality and Year as fixed factors.

| (A)                                                                                             |                        |                 |                  |                  |                        |        |          |         |
|-------------------------------------------------------------------------------------------------|------------------------|-----------------|------------------|------------------|------------------------|--------|----------|---------|
| M.a <- formula(Size ~ Sex * Species * Locality)                                                 |                        |                 |                  |                  |                        |        |          |         |
| M1 <- gls(M.a , method = "REML", data = PARROT)                                                 |                        |                 |                  |                  |                        |        |          |         |
| Linear mixed-effects model fit by REML                                                          |                        |                 |                  |                  |                        |        |          |         |
| Data: PARROT                                                                                    |                        |                 |                  |                  |                        |        |          |         |
|                                                                                                 | AIC                    | BIC             | logLik           |                  |                        |        |          |         |
|                                                                                                 | 53942.23               | 54216.51        | -26929.11        |                  |                        |        |          |         |
| Random effects:                                                                                 |                        |                 |                  |                  |                        |        |          |         |
| Formula: ~1   Station                                                                           |                        |                 |                  |                  |                        |        |          |         |
|                                                                                                 | (Intercept)            | Residual        |                  |                  |                        |        |          |         |
| StdDev:                                                                                         | 17.00036               | 47.63831        |                  |                  |                        |        |          |         |
| Number of Observations: 5108                                                                    |                        |                 |                  |                  |                        |        |          |         |
| Number of Groups: 64                                                                            |                        |                 |                  |                  |                        |        |          |         |
| M2 <- lme (M.a, random = ~1   Station, weights = varIdent(form = ~ 1   Species), data = PARROT) |                        |                 |                  |                  |                        |        |          |         |
| Linear mixed-effects model fit by REML                                                          |                        |                 |                  |                  |                        |        |          |         |
| Data: PARROT                                                                                    |                        |                 |                  |                  |                        |        |          |         |
|                                                                                                 | AIC                    | BIC             | logLik           |                  |                        |        |          |         |
|                                                                                                 | 53245.79               | 53546.2         | -26576.89        |                  |                        |        |          |         |
| Random effects:                                                                                 |                        |                 |                  |                  |                        |        |          |         |
| Formula: ~1   Stations                                                                          |                        |                 |                  |                  |                        |        |          |         |
|                                                                                                 | (Intercept)            | Residual        |                  |                  |                        |        |          |         |
| StdDev:                                                                                         | 14.5811                | 42.24512        |                  |                  |                        |        |          |         |
| Variance function:                                                                              |                        |                 |                  |                  |                        |        |          |         |
| Structure: Different standard deviations per stratum                                            |                        |                 |                  |                  |                        |        |          |         |
| Formula: ~1   Species                                                                           |                        |                 |                  |                  |                        |        |          |         |
| Parameter estimates:                                                                            |                        |                 |                  |                  |                        |        |          |         |
|                                                                                                 | <i>S. taeniopterus</i> | <i>S. iseri</i> | <i>S. viride</i> | <i>S. vetula</i> | <i>S. aurofrenatum</i> |        |          |         |
|                                                                                                 | 1.00                   | 0.80            | 1.70             | 1.50             | 1.04                   |        |          |         |
| Number of Observations: 5108                                                                    |                        |                 |                  |                  |                        |        |          |         |
| Number of Groups: 64                                                                            |                        |                 |                  |                  |                        |        |          |         |
|                                                                                                 | Model                  | df              | AIC              | BIC              | logLik                 | Test   | L.Ratio  | p-value |
| M1                                                                                              | 1                      | 44              | 53837.26         | 54124.61         | -26874.63              |        |          |         |
| M2                                                                                              | 2                      | 46              | 53245.79         | 53546.20         | -26576.89              | 1 vs 2 | 595.4719 | <.0001  |

## GAMMs

```
M3 <- gamm(Size ~ Sex * Species * Locality, random = list(Station =~ 1), data = PARROT)
```

|     | Length | Class | Mode |
|-----|--------|-------|------|
| lme | 18     | Lme   | List |
| gam | 30     | 30    | List |

```
anova(M3$gam)
```

Family: gaussian

Link function: identity

Formula:

```
Size ~ Species * Locality * Sex
```

Parametric Terms:

|                      | df | F      | p-value  |
|----------------------|----|--------|----------|
| Species              | 4  | 79.418 | < 2e-16  |
| Locality             | 3  | 3.124  | 0.0248   |
| Sex                  | 1  | 49.549 | 2.19e-12 |
| Species:Locality:Sex | 12 | 5.343  | 4.60e-09 |

R-sq.(adj) = 0.571

Scale est. = 2253.4 n = 5108

## (B)

```
M.b <- formula(Size ~ Species * Locality)
```

```
M4 <- gls(M.b , method = "REML", data = PARROT1)
```

Linear mixed-effects model fit by REML

Data: PARROT1

| AIC      | BIC      | logLik    |
|----------|----------|-----------|
| 63974.98 | 64201.62 | -31953.49 |

Random effects:

Formula: ~1 | Stations

|         | (Intercept) | Residual |
|---------|-------------|----------|
| StdDev: | 19.50081    | 58.20187 |

Number of Observations: 5834

Number of Groups: 64

```
M5 <- lme(M.b , random = ~ 1 | Station, weights = varIdent(form = ~ 1 | Species), data = PARROT1)
```

Linear mixed-effects model fit by REML

Data: PARROT1

| AIC     | BIC      | logLik    |
|---------|----------|-----------|
| 62702.3 | 62975.61 | -31310.15 |

Random effects:

Formula: ~1 | Station  
(Intercept) Residual  
StdDev: 16.80161 5 0.75933

Variance function:

Structure: Different standard deviations per stratum

Formula: ~1 | Species

Parameter estimates:

|                        |                 |                  |                  |                        |                      |                        |
|------------------------|-----------------|------------------|------------------|------------------------|----------------------|------------------------|
| <i>S. taeniopterus</i> | <i>S. iseri</i> | <i>S. viride</i> | <i>S. vetula</i> | <i>S. aurofrenatum</i> | <i>S. rubripinne</i> | <i>S. chrysopterus</i> |
| 1.00                   | 0.78            | 1.89             | 1.56             | 1.08                   | 1.52                 | 1.44                   |

Number of Observations: 5834

Number of Groups: 64

|    | Model | df | AIC      | BIC      | logLik    | Test   | L.Ratio  | p-value |
|----|-------|----|----------|----------|-----------|--------|----------|---------|
| M1 | 1     | 33 | 64291.13 | 64511.10 | -32112.56 |        |          |         |
| M2 | 2     | 41 | 62702.30 | 62975.61 | -31310.15 | 1 vs 2 | 1604.821 | <.0001  |

### GAMMs

Family: gaussian

Link function: identity

Formula:

Size ~ Species \* Locality

```
M6 <- gamm(Size ~ Species * Locality, random = list(Station =~ 1), data = PARROT1)
```

```
anova(M6$gam)
```

Parametric Terms:

|                  | df | F       | p-value |
|------------------|----|---------|---------|
| Species          | 7  | 108.053 | < 2e-16 |
| Locality         | 3  | 2.866   | 0.0352  |
| Species:Locality | 21 | 12.207  | < 2e-16 |

R-sq.(adj) = 0.396

Scale est. = 3371.4 n = 5834

(C)

```
M.f <- formula(Size ~ Species * Locality * Year * Sex)
```

```
M7 <- gls(M.e, method = "REML", data = PARROT3)
```

Linear mixed-effects model fit by REML

Data: PARROT3

| AIC      | BIC      | logLik    |
|----------|----------|-----------|
| 60855.33 | 61134.92 | -30385.67 |

Random effects:

Formula: ~1 | Stations  
(Intercept) Residual  
StdDev: 13.65538 46.53488

Number of Observations: 5789

Number of Groups: 64

M8 <- lme(M.e , random = ~ 1 | Station, weights = varIdent(form = ~ 1 | Species), data = PARROT3)

Linear mixed-effects model fit by REML

Data: PARROT3  
AIC BIC logLik  
60228.06 60534.27 -30068.03

Random effects:

Formula: ~1 | Station  
(Intercept) Residual  
StdDev: 13.5467 39.13895

Variance function:

Structure: Different standard deviations per stratum

Formula: ~1 | Species

Parameter estimates:

|                        |                 |                  |                        |                  |
|------------------------|-----------------|------------------|------------------------|------------------|
| <i>S. taeniopterus</i> | <i>S. iseri</i> | <i>S. viride</i> | <i>S. aurofrenatum</i> | <i>S. vetula</i> |
| 1.00                   | 0.90            | 1.67             | 1.14                   | 1.66             |

Number of Observations: 5789

Number of Groups: 64

|    | Model | df | AIC      | BIC      | logLik     | Test   | L.Ratio  | p-value |
|----|-------|----|----------|----------|------------|--------|----------|---------|
| M7 | 1     | 41 | 61142.86 | 61415.79 | --30530.43 |        |          |         |
| M8 | 2     | 46 | 60228.06 | 60534.27 | -30068.03  | 1 vs 2 | 924.8064 | <.0001  |

## GAMMs

anova(M9\$gam)

Parametric Terms:

|                           | df | F     | p-value  |
|---------------------------|----|-------|----------|
| Species                   | 4  | 5.458 | 0.000220 |
| Locality                  | 1  | 0.002 | 0.0248   |
| Sex                       | 1  | 5.601 | 2.19e-12 |
| Year                      | 1  | 1.165 | 0.280405 |
| Species:Locality:Sex:Year | 4  | 5.675 | 0.294356 |

R-sq.(adj) = 0.342

Scale est. = 3461.9 n = 6253

(D)

M.e <- formula(Size ~ Species \* Locality\*Year)  
M10 <- gls(M.e , method = "REML", data = PARROT4)

Linear mixed-effects model fit by REML

Data: PARROT4

AIC BIC logLik  
68738.95 68941.04 -34339.48

Random effects:

Formula: ~1 | Stations

(Intercept) Residual

StdDev: 16.48995 58.94914

Number of Observations: 6253

Number of Groups: 64

M11 <- lme(M.e , random = ~ 1 | Station, weights = varIdent(form = ~ 1 | Species), data = PARROT4)

Linear mixed-effects model fit by REML

Data: PARROT4

AIC BIC logLik  
68032.83 68275.33 -33980.41

Random effects:

Formula: ~1 | Stations

(Intercept) Residual

StdDev: 15.99506 49.60637

Variance function:

Structure: Different standard deviations per stratum

Formula: ~1 | Species

Parameter estimates:

| <i>S. taeniopterus</i> | <i>S. iseri</i> | <i>S. viride</i> | <i>S. aurofrenatum</i> | <i>S. vetula</i> | <i>S. chrysopteron</i> | <i>S. rubripinne</i> |
|------------------------|-----------------|------------------|------------------------|------------------|------------------------|----------------------|
| 1.00                   | 0.88            | 1.66             | 1.07                   | 1.56             | 1.44                   | 1.62                 |

Number of Observations: 6253

Number of Groups: 64

|     | Model | df | AIC      | BIC      | logLik    | Test   | L.Ratio  | p-value |
|-----|-------|----|----------|----------|-----------|--------|----------|---------|
| M10 | 1     | 29 | 69003.32 | 69198.67 | -34472.66 |        |          |         |
| M11 | 2     | 36 | 68032.83 | 68275.33 | -33980.41 | 1 vs 2 | 984.4941 | <.0001  |

### GAMMs

```
M12 <- gamm(Size ~ Species * Locality * Year, random = list(Station =~ 1), data = PARROT4)
```

```
anova(M3$gam)
```

Family: gaussian

Link function: identity

Formula:

```
Size ~ Species * Locality * Year
```

Parametric Terms:

|                       | df | F     | p-value  |
|-----------------------|----|-------|----------|
| Species               | 6  | 7.447 | 5.79e-08 |
| Locality              | 1  | 1.451 | 0.988    |
| Year                  | 1  | 1.861 | 0.173    |
| Species:Locality:Year | 6  | 1.449 | 0.192    |

R-sq.(adj) = 0.342

Scale est. = 3461.9 n = 6253
