# Supplementary material for: Spatial variation of parrotfish assemblages at oceanic islands in the western Caribbean: evidence of indirect effects of fishing?
Source: PeerJ journal article supplement (doi:10.7717/peerj.14178), 2022-11-28
Supplement: Table_S3.pdf [file Table_S3.pdf]

**Table S3. Summary of total length (TL) results collected in 2018.** Sample size (n) of populations whose TL was calculated; mean, minimum and maximum TL for each species and their males (M) and females (F) populations is presented for San Andrés (SA), Bolivar (BOL), Albuquerque (ALB), and Providencia and Santa catalina (PRO).

| SPECIE                           | SA  |           |           | BOL       |     |           | ALB       |           |     | PRO       |           |           |     |           |           |           |
|----------------------------------|-----|-----------|-----------|-----------|-----|-----------|-----------|-----------|-----|-----------|-----------|-----------|-----|-----------|-----------|-----------|
|                                  | n   | MEAN (mm) | Min. (mm) | Max. (mm) | n   | MEAN (mm) | Min. (mm) | Max. (mm) | n   | MEAN (mm) | Min. (mm) | Max. (mm) | n   | MEAN (mm) | Min. (mm) | Max. (mm) |
| <i>Scarus coelestinus</i>        | 2   | 574       | 487       | 660       | 3   | 510       | 273       | 697       | 4   | 333       | 268       | 420       | 10  | 479       | 387       | 597       |
| <i>Scarus coeruleus</i>          |     |           |           |           |     |           |           |           |     |           |           |           | 9   | 548       | 452       | 600       |
| (F)                              |     |           |           |           |     |           |           |           |     |           |           |           |     |           |           |           |
| (M)                              |     |           |           |           |     |           |           |           |     |           |           |           | 9   | 548       | 452       | 600       |
| <i>Scarus guacamaia</i>          |     |           |           |           |     |           |           |           |     |           |           |           | 2   | 497       | 479       | 515       |
| (F)                              |     |           |           |           |     |           |           |           |     |           |           |           | 2   | 497       | 479       | 515       |
| (M)                              |     |           |           |           |     |           |           |           |     |           |           |           |     |           |           |           |
| <i>Scaris iseri/taeniopterus</i> | 115 | 89        | 28        | 213       | 122 | 95        | 35        | 273       | 268 | 100       | 29        | 270       | 111 | 78        | 28        | 195       |
| <i>Scarus iseri</i>              | 383 | 127       | 23        | 253       | 441 | 116       | 28        | 274       | 186 | 125       | 40        | 228       | 484 | 109       | 35        | 279       |
| (F)                              | 324 | 116       | 23        | 253       | 363 | 107       | 28        | 252       | 104 | 105       | 40        | 228       | 362 | 97        | 35        | 279       |
| (M)                              | 59  | 187       | 88        | 239       | 78  | 159       | 82        | 274       | 82  | 150       | 95        | 215       | 122 | 146       | 83        | 245       |
| <i>Scarus taeniopterus</i>       | 543 | 148       | 36        | 369       | 269 | 151       | 26        | 280       | 165 | 158       | 47        | 289       | 311 | 139       | 34        | 352       |
| (F)                              | 450 | 137       | 36        | 369       | 228 | 140       | 26        | 249       | 135 | 144       | 47        | 243       | 258 | 122       | 34        | 352       |
| (M)                              | 93  | 202       | 112       | 317       | 41  | 216       | 87        | 280       | 30  | 222       | 130       | 289       | 53  | 222       | 84        | 326       |
| <i>Scarus vetula</i>             | 59  | 212       | 75        | 526       | 77  | 228       | 71        | 394       | 66  | 219       | 91        | 370       | 55  | 260       | 81        | 462       |
| (F)                              | 52  | 200       | 75        | 526       | 57  | 189       | 71        | 350       | 54  | 202       | 91        | 314       | 40  | 230       | 81        | 367       |
| (M)                              | 7   | 301       | 238       | 417       | 20  | 340       | 270       | 394       | 12  | 300       | 224       | 370       | 15  | 340       | 292       | 462       |
| <i>Sparisoma atomarium</i>       | 48  | 87        | 41        | 188       | 42  | 76        | 31        | 144       | 26  | 87        | 54        | 350       | 45  | 94        | 42        | 360       |
| <i>Sparisoma aurofrenatum</i>    | 352 | 149       | 26        | 255       | 289 | 140       | 26        | 261       | 233 | 152       | 34        | 319       | 364 | 165       | 29        | 331       |
| (F)                              | 289 | 136       | 26        | 239       | 238 | 122       | 26        | 239       | 175 | 127       | 34        | 231       | 272 | 149       | 29        | 331       |
| (M)                              | 63  | 210       | 178       | 255       | 51  | 220       | 187       | 261       | 58  | 226       | 187       | 319       | 92  | 210       | 171       | 263       |
| <i>Sparisoma chrysopteron</i>    | 9   | 301       | 198       | 375       | 5   | 307       | 118       | 414       | 6   | 339       | 315       | 388       | 29  | 293       | 59        | 365       |
| <i>Sparisoma rubripinne</i>      | 7   | 278       | 174       | 337       | 19  | 294       | 131       | 385       | 27  | 239       | 85        | 365       | 8   | 308       | 263       | 342       |
| <i>Sparisoma viride</i>          | 140 | 185       | 25        | 421       | 203 | 229       | 40        | 441       | 216 | 246       | 41        | 549       | 272 | 261       | 25        | 423       |
| (F)                              | 124 | 167       | 25        | 334       | 161 | 190       | 40        | 366       | 153 | 202       | 41        | 523       | 201 | 227       | 25        | 377       |
| (M)                              | 16  | 326       | 220       | 421       | 42  | 375       | 236       | 441       | 63  | 354       | 191       | 549       | 71  | 357       | 271       | 423       |
