# Supplementary material for: Spatial variation of parrotfish assemblages at oceanic islands in the western Caribbean: evidence of indirect effects of fishing?
Source: PeerJ journal article supplement (doi:10.7717/peerj.14178), 2022-11-28
Supplement: Table_S4.pdf [file Table_S4.pdf]

**Table S4. Summary of total length (TL) results collected in 2019.** Sample size (n) of populations whose TL was calculated; mean, minimum and maximum TL for each species and their males (M) and females (F) populations is presented for San Andrés (SA), and Providencia and Santa Catalina (PRO).

| SPECIES (SEX)                    | SA  |              |              |              | PRO |              |              |              |
|----------------------------------|-----|--------------|--------------|--------------|-----|--------------|--------------|--------------|
|                                  | n   | MEAN<br>(mm) | Min.<br>(mm) | Max.<br>(mm) | n   | MEAN<br>(mm) | Min.<br>(mm) | Max.<br>(mm) |
| <i>Scarus coelestinus</i>        | 22  | 533          | 234          | 903          | 31  | 393          | 214          | 640          |
| <i>Scarus coeruleus</i>          | 1   | 348          | 348          | 348          | 5   | 189          | 86           | 280          |
| <i>Scarus guacamaia</i>          | 23  | 351          | 207          | 1042         | 20  | 311          | 154          | 701          |
| (F)                              | 18  | 294          | 207          | 519          | 17  | 261          | 154          | 514          |
| (M)                              | 5   | 556          | 383          | 1042         | 3   | 595          | 531          | 701          |
| <i>Scaris iseri/taeniopterus</i> | 272 | 71           | 16           | 200          | 132 | 62           | 30           | 145          |
| <i>Scarus iseri</i>              | 439 | 138          | 29           | 282          | 278 | 118          | 41           | 232          |
| (F)                              | 353 | 123          | 29           | 246          | 207 | 101          | 41           | 203          |
| (M)                              | 86  | 199          | 65           | 282          | 71  | 166          | 124          | 232          |
| <i>Scarus taeniopterus</i>       | 630 | 159          | 49           | 345          | 43  | 159          | 78           | 294          |
| (F)                              | 501 | 142          | 49           | 296          | 33  | 130          | 78           | 238          |
| (M)                              | 129 | 224          | 140          | 345          | 10  | 252          | 233          | 294          |
| <i>Scarus vetula</i>             | 153 | 182          | 42           | 418          | 153 | 220          | 40           | 352          |
| (F)                              | 141 | 169          | 42           | 403          | 121 | 199          | 40           | 306          |
| (M)                              | 12  | 326          | 240          | 418          | 32  | 298          | 221          | 352          |
| <i>Sparisoma atomarium</i>       | 13  | 95           | 55           | 138          | 7   | 72           | 36           | 112          |
| <i>Sparisoma aurofrenatum</i>    | 423 | 158          | 26           | 287          | 233 | 154          | 27           | 268          |
| (F)                              | 323 | 141          | 26           | 271          | 202 | 142          | 27           | 266          |
| (M)                              | 100 | 214          | 165          | 287          | 31  | 231          | 162          | 268          |
| <i>Sparisoma chrysopterum</i>    | 85  | 223          | 85           | 356          | 118 | 250          | 91           | 431          |
| (F)                              | 51  | 190          | 85           | 343          | 77  | 236          | 91           | 429          |
| (M)                              | 34  | 272          | 187          | 356          | 41  | 276          | 179          | 431          |
| <i>Sparisoma rubripinne</i>      | 55  | 209          | 73           | 359          | 153 | 253          | 68           | 463          |
| <i>Sparisoma viride</i>          | 274 | 192          | 31           | 530          | 200 | 251          | 45           | 439          |
| (F)                              | 231 | 173          | 31           | 530          | 139 | 217          | 45           | 347          |
| (M)                              | 43  | 299          | 160          | 425          | 61  | 330          | 179          | 439          |
