# Supplementary material for: Spatial variation of parrotfish assemblages at oceanic islands in the western Caribbean: evidence of indirect effects of fishing?
Source: PeerJ journal article supplement (doi:10.7717/peerj.14178), 2022-11-28
Supplement: Table_S5.pdf [file Table_S5.pdf]

**Table S5. Summary of SIMPER results for parrotfishes abundances data collected in 2018.** Average abundance (with square root transformation) of species between location were significant differences were found, the average dissimilarity (Av.Diss), their contribution (Contrib%) to the within-group dissimilarity, and the cumulative total (Cum.%) of contributions (90% cut-off). Sex is detailed in the corresponding SIMPER summary (M: Males; F: Females)

**SPECIES ABUNDANCE 2018**

| Locality                      | Average abundance |            | Av. Diss | SD | Contrib% | Cum.% |
|-------------------------------|-------------------|------------|----------|----|----------|-------|
|                               | ALB               | SA         |          |    |          |       |
| <i>Scarus iseri</i>           | 4                 | 6          | 6        | 1  | 21       | 21    |
| <i>Scarus taeniopterus</i>    | 4                 | 6          | 6        | 1  | 20       | 41    |
| <i>Sparisoma aurofrenatum</i> | 4                 | 5          | 4        | 1  | 13       | 54    |
| <i>Sparisoma viride</i>       | 4                 | 3          | 4        | 1  | 12       | 66    |
| <i>Scarus vetula</i>          | 2                 | 2          | 3        | 1  | 11       | 77    |
| <i>Sparisoma atomarium</i>    | 1                 | 2          | 3        | 1  | 9        | 86    |
| <i>Sparisoma rubripinne</i>   | 1                 | 0          | 2        | 1  | 8        | 94    |
|                               | <b>BOL</b>        | <b>SA</b>  |          |    |          |       |
| <i>Scarus taeniopterus</i>    | 4                 | 6          | 7        | 1  | 24       | 24    |
| <i>Scarus iseri</i>           | 5                 | 6          | 5        | 1  | 17       | 41    |
| <i>Scarus vetula</i>          | 2                 | 2          | 3        | 1  | 13       | 54    |
| <i>Sparisoma viride</i>       | 4                 | 3          | 3        | 1  | 12       | 66    |
| <i>Sparisoma aurofrenatum</i> | 5                 | 5          | 3        | 1  | 11       | 77    |
| <i>Sparisoma atomarium</i>    | 1                 | 2          | 3        | 1  | 11       | 88    |
| <i>Sparisoma rubripinne</i>   | 1                 | 0          | 2        | 1  | 6        | 94    |
|                               | <b>SA</b>         | <b>PRO</b> |          |    |          |       |
| <i>Scarus taeniopterus</i>    | 6                 | 5          | 5        | 1  | 21       | 21    |
| <i>Scarus iseri</i>           | 6                 | 5          | 4        | 1  | 17       | 38    |
| <i>Sparisoma viride</i>       | 3                 | 4          | 4        | 1  | 14       | 53    |
| <i>Scarus vetula</i>          | 2                 | 2          | 3        | 1  | 12       | 65    |
| <i>Sparisoma aurofrenatum</i> | 5                 | 5          | 3        | 1  | 10       | 75    |
| <i>Sparisoma atomarium</i>    | 2                 | 2          | 3        | 1  | 10       | 85    |
| <i>Sparisoma chrysopterus</i> | 0                 | 1          | 2        | 1  | 6        | 92    |

**SPECIES (SEX) ABUNDANCE 2018**

|                                   | Average abundance |           | Av. Diss | SD | Contrib% | Cum.% |
|-----------------------------------|-------------------|-----------|----------|----|----------|-------|
|                                   | ALB               | SA        |          |    |          |       |
| <i>Scarus iseri</i> (F)           | 3                 | 5         | 5        | 1  | 15       | 15    |
| <i>Scarus taeniopterus</i> (F)    | 4                 | 5         | 5        | 1  | 14       | 29    |
| <i>Sparisoma aurofrenatum</i> (F) | 4                 | 5         | 3        | 1  | 9        | 38    |
| <i>Sparisoma viride</i> (F)       | 3                 | 3         | 3        | 1  | 8        | 47    |
| <i>Scarus taeniopterus</i> (M)    | 1                 | 2         | 3        | 2  | 8        | 55    |
| <i>Scarus vetula</i> (F)          | 2                 | 2         | 3        | 1  | 7        | 62    |
| <i>Sparisoma atomarium</i>        | 1                 | 2         | 2        | 1  | 7        | 69    |
| <i>Sparisoma viride</i> (M)       | 2                 | 1         | 2        | 1  | 7        | 76    |
| <i>Scarus iseri</i> (M)           | 2                 | 2         | 2        | 1  | 6        | 82    |
| <i>Sparisoma rubripinne</i>       | 1                 | 0         | 2        | 1  | 6        | 88    |
| <i>Sparisoma aurofrenatum</i> (M) | 2                 | 2         | 1        | 1  | 4        | 92    |
|                                   | <b>BOL</b>        | <b>SA</b> |          |    |          |       |
| <i>Scarus taeniopterus</i> (F)    | 4                 | 5         | 5        | 1  | 17       | 17    |
| <i>Scarus iseri</i> (F)           | 5                 | 5         | 4        | 1  | 13       | 29    |
| <i>Scarus vetula</i> (F)          | 2                 | 2         | 3        | 1  | 9        | 38    |
| <i>Sparisoma viride</i> (F)       | 3                 | 3         | 3        | 1  | 9        | 47    |
| <i>Scarus taeniopterus</i> (M)    | 1                 | 2         | 2        | 2  | 8        | 55    |
| <i>Sparisoma atomarium</i>        | 1                 | 2         | 2        | 1  | 8        | 63    |
| <i>Sparisoma aurofrenatum</i> (F) | 4                 | 5         | 2        | 1  | 8        | 71    |
| <i>Sparisoma viride</i> (M)       | 1                 | 1         | 2        | 1  | 6        | 76    |
| <i>Scarus vetula</i> (M)          | 1                 | 0         | 2        | 1  | 5        | 82    |

|                                   |           |            |   |   |    |    |
|-----------------------------------|-----------|------------|---|---|----|----|
| <i>Scarus iseri</i> (M)           | 2         | 2          | 1 | 1 | 5  | 86 |
| <i>Sparisoma aurofrenatum</i> (M) | 2         | 2          | 1 | 1 | 5  | 91 |
|                                   | <b>SA</b> | <b>PRO</b> |   |   |    |    |
| <i>Scarus taeniopterus</i> (F)    | 5         | 4          | 4 | 1 | 14 | 14 |
| <i>Scarus iseri</i> (F)           | 5         | 5          | 3 | 1 | 12 | 26 |
| <i>Sparisoma viride</i> (F)       | 3         | 4          | 3 | 1 | 9  | 35 |
| <i>Sparisoma viride</i> (M)       | 1         | 2          | 2 | 1 | 8  | 43 |
| <i>Scarus taeniopterus</i> (M)    | 2         | 1          | 2 | 1 | 8  | 51 |
| <i>Scarus vetula</i> (F)          | 2         | 1          | 2 | 1 | 8  | 59 |
| <i>Sparisoma atomarium</i>        | 2         | 2          | 2 | 1 | 7  | 66 |
| <i>Sparisoma aurofrenatum</i> (F) | 5         | 4          | 2 | 1 | 7  | 73 |
| <i>Scarus iseri</i> (M)           | 2         | 3          | 2 | 1 | 6  | 80 |
| <i>Sparisoma aurofrenatum</i> (M) | 2         | 3          | 1 | 1 | 5  | 85 |
| <i>Scarus vetula</i> (M)          | 0         | 1          | 1 | 1 | 5  | 90 |
| <i>Sparisoma chrysopterus</i>     | 0         | 1          | 1 | 1 | 5  | 94 |
