# Supplementary material for: Spatial variation of parrotfish assemblages at oceanic islands in the western Caribbean: evidence of indirect effects of fishing?
Source: PeerJ journal article supplement (doi:10.7717/peerj.14178), 2022-11-28
Supplement: Table_S6.pdf [file Table_S6.pdf]

**Table S6. Summary of SIMPER results for parrotfishes abundances data collected in 2019.** Average abundance (with square root transformation) of species between location were significant differences were found, the average dissimilarity (Av.Diss), their contribution (Contrib%) to the within-group dissimilarity, and the cumulative total (Cum.%) of contributions (90% cut-off). Sex is detailed in the corresponding SIMPER summary (M: Males; F: Females)

| Locality                            | Average abundance |    | Av. Diss | SD | Contrib% | Cum.% |
|-------------------------------------|-------------------|----|----------|----|----------|-------|
|                                     | PRO               | SA |          |    |          |       |
| <i>Scarus taeniopterus</i>          | 1                 | 6  | 11       | 2  | 25       | 25    |
| <i>Scarus iseri</i>                 | 5                 | 6  | 5        | 1  | 13       | 38    |
| <i>Scarus vetula</i>                | 2                 | 3  | 5        | 1  | 11       | 49    |
| <i>Sparisoma rubripinne</i>         | 2                 | 1  | 4        | 1  | 11       | 59    |
| <i>Sparisoma chrysopterum</i>       | 2                 | 2  | 4        | 1  | 10       | 70    |
| <i>Sparisoma aurofrenatum</i>       | 4                 | 5  | 4        | 1  | 10       | 80    |
| <i>Sparisoma viride</i>             | 3                 | 4  | 3        | 1  | 7        | 87    |
| <i>Scarus coelestinus</i>           | 1                 | 0  | 2        | 1  | 5        | 92    |
| <b>SPECIES ABUNDANCE (SEX) 2019</b> |                   |    |          |    |          |       |
| <i>Scarus taeniopterus</i> (F)      | 1                 | 6  | 8        | 2  | 17       | 17    |
| <i>Scarus iseri</i> (F)             | 4                 | 5  | 4        | 1  | 9        | 27    |
| <i>Scarus taeniopterus</i> (M)      | 0                 | 2  | 4        | 1  | 8        | 35    |
| <i>Sparisoma rubripinne</i>         | 2                 | 1  | 4        | 1  | 8        | 43    |
| <i>Sparisoma chrysopterum</i>       | 2                 | 2  | 4        | 1  | 8        | 51    |
| <i>Scarus vetula</i> (F)            | 2                 | 2  | 4        | 1  | 8        | 59    |
| <i>Sparisoma aurofrenatum</i> (F)   | 3                 | 4  | 3        | 1  | 6        | 66    |
| <i>Sparisoma viride</i> (F)         | 3                 | 4  | 3        | 1  | 6        | 72    |
| <i>Sparisoma aurofrenatum</i> (M)   | 1                 | 2  | 2        | 2  | 6        | 77    |
| <i>Scarus iseri</i> (M)             | 2                 | 2  | 2        | 1  | 5        | 82    |
| <i>Sparisoma viride</i> (M)         | 2                 | 1  | 2        | 1  | 4        | 86    |
| <i>Scarus coelestinus</i>           | 1                 | 0  | 2        | 1  | 4        | 90    |
| <i>Scarus vetula</i> (M)            | 1                 | 1  | 2        | 1  | 4        | 93    |
