# Supplementary material for: Spatial variation of parrotfish assemblages at oceanic islands in the western Caribbean: evidence of indirect effects of fishing?
Source: PeerJ journal article supplement (doi:10.7717/peerj.14178), 2022-11-28
Supplement: Table_S7.pdf [file Table_S7.pdf]

**Table S7. Summary of SIMPER results for parrotfishes biomass data collected in 2018.**

Average abundance (estandarized biomass) of species between location were significant differences were found, the average dissimilarity (Av.Diss), their contribution (Contrib%) to the within-group dissimilarity, and the cumulative total (Cum.%) of contributions (90% cut-off). Sex is detailed in the corresponding SIMPER summary (M: Males; F: Females)

**SPECIES BIOMASS 2018**

| Locality                         | Average abundance |            | Av. Diss | SD   | Contrib% | Cum.% |
|----------------------------------|-------------------|------------|----------|------|----------|-------|
|                                  | ALB               | SA         |          |      |          |       |
| <i>Scarus taeniopterus</i>       | 0.8               | 0.48       | 6.65     | 1.59 | 17.98    | 17.98 |
| <i>Sparisoma viride</i>          | 0.65              | 0.45       | 5.92     | 1.51 | 16       | 33.98 |
| <i>Scarus vetula</i>             | 0.23              | 0.2        | 4.96     | 1.35 | 13.41    | 47.39 |
| <i>Scarus iseri</i>              | 0.21              | 0.33       | 3.47     | 1.32 | 9.39     | 56.78 |
| <i>Sparisoma rubripinne</i>      | 0.13              | 0.06       | 3.34     | 0.87 | 9.03     | 65.82 |
| <i>Sparisoma aurofrenatum</i>    | 0.36              | 0.43       | 3.27     | 1.17 | 8.85     | 74.67 |
| <i>Sparisoma chrysopterus</i>    | 0.09              | 0.12       | 3.21     | 1.05 | 8.67     | 83.34 |
| <i>Scarus iseri/taeniopterus</i> | 0.17              | 0.08       | 3.11     | 1.34 | 8.4      | 91.74 |
|                                  | <b>BOL</b>        | <b>SA</b>  |          |      |          |       |
| <i>Scarus vetula</i>             |                   | 0.2        | 6        | 1.36 | 17.62    | 17.62 |
| <i>Scarus taeniopterus</i>       | 0.32              | 0.48       | 5.9      | 1.47 | 17.32    | 34.94 |
| <i>Sparisoma viride</i>          | 0.61              | 0.45       | 5.19     | 1.47 | 15.24    | 50.18 |
| <i>Sparisoma aurofrenatum</i>    | 0.33              | 0.43       | 3.28     | 1.28 | 9.63     | 59.82 |
| <i>Scarus coelestinus</i>        | 0.07              | 0.06       | 2.8      | 0.43 | 8.23     | 68.05 |
| <i>Sparisoma chrysopterus</i>    | 0.04              | 0.12       | 2.74     | 0.99 | 8.05     | 76.1  |
| <i>Scarus iseri</i>              | 0.29              | 0.33       | 2.65     | 1.34 | 7.77     | 83.87 |
| <i>Sparisoma rubripinne</i>      | 0.09              | 0.06       | 2.57     | 0.76 | 7.55     | 91.42 |
|                                  | <b>SA</b>         | <b>PRO</b> |          |      |          |       |
| <i>Scarus taeniopterus</i>       | 0.48              | 0.26       | 5.92     | 1.75 | 15.82    | 15.82 |
| <i>Scarus vetula</i>             | 0.2               | 0.22       | 4.84     | 1.37 | 12.93    | 28.75 |
| <i>Sparisoma viride</i>          | 0.45              | 0.64       | 4.81     | 1.31 | 12.86    | 41.6  |
| <i>Scarus coelestinus</i>        | 0.06              | 0.13       | 3.81     | 0.61 | 10.2     | 51.8  |
| <i>Sparisoma aurofrenatum</i>    | 0.43              | 0.35       | 3.54     | 1.32 | 9.46     | 61.26 |
| <i>Sparisoma chrysopterus</i>    | 0.12              | 0.1        | 3.48     | 0.85 | 9.3      | 70.55 |
| <i>Scarus iseri</i>              | 0.33              | 0.22       | 3.08     | 1.46 | 8.23     | 78.78 |
| <i>Scarus coeruleus</i>          | 0                 | 0.14       | 3.04     | 0.54 | 8.12     | 86.9  |
| <i>Sparisoma rubripinne</i>      | 0.06              | 0.04       | 1.81     | 0.68 | 4.85     | 91.75 |

**SPECIES (SEX) BIOMASS 2018**

|                                   | ALB        | SA        |      |      |       |       |
|-----------------------------------|------------|-----------|------|------|-------|-------|
| <i>Sparisoma viride</i> (M)       | 0.43       | 0.23      | 5.9  | 1.49 | 14.5  | 14.5  |
| <i>Scarus taeniopterus</i> (F)    | 0.21       | 0.39      | 4.57 | 1.7  | 11.23 | 25.74 |
| <i>Scarus taeniopterus</i> (M)    | 0.16       | 0.29      | 3.7  | 1.37 | 9.09  | 34.83 |
| <i>Sparisoma viride</i> (F)       | 0.43       | 0.37      | 3.4  | 1.3  | 8.38  | 43.21 |
| <i>Scarus vetula</i> (F)          | 0.2        | 0.16      | 3.39 | 1.2  | 8.35  | 51.56 |
| <i>Scarus iseri</i> (F)           | 0.11       | 0.27      | 3.16 | 1.64 | 7.77  | 59.33 |
| <i>Sparisoma aurofrenatum</i> (F) | 0.24       | 0.36      | 2.84 | 1.24 | 6.99  | 66.32 |
| <i>Sparisoma rubripinne</i>       | 0.13       | 0.06      | 2.7  | 0.87 | 6.64  | 72.96 |
| <i>Sparisoma chrysopterus</i>     | 0.09       | 0.12      | 2.58 | 1.05 | 6.35  | 79.31 |
| <i>Scarus iseri/taeniopterus</i>  | 0.17       | 0.08      | 2.53 | 1.35 | 6.22  | 85.54 |
| <i>Sparisoma aurofrenatum</i> (M) | 0.26       | 0.27      | 2.04 | 1.28 | 5.02  | 90.56 |
|                                   | <b>BOL</b> | <b>SA</b> |      |      |       |       |
| <i>Sparisoma viride</i> (M)       | 0.34       | 0.23      | 4.92 | 1.4  | 13.63 | 13.63 |
| <i>Scarus taeniopterus</i> (F)    | 0.24       | 0.39      | 4.2  | 1.4  | 11.63 | 25.26 |
| <i>Scarus vetula</i> (M)          | 0.21       | 0.07      | 3.77 | 1.09 | 10.44 | 35.7  |
| <i>Scarus vetula</i> (F)          | 0.17       | 0.16      | 3.34 | 1.2  | 9.26  | 44.96 |
| <i>Scarus taeniopterus</i> (M)    | 0.2        | 0.29      | 3.19 | 1.5  | 8.84  | 53.8  |

|                                   |           |            |      |      |       |       |
|-----------------------------------|-----------|------------|------|------|-------|-------|
| <i>Sparisoma viride</i> (F)       | 0.46      | 0.37       | 3.15 | 1.21 | 8.73  | 62.53 |
| <i>Sparisoma aurofrenatum</i> (F) | 0.25      | 0.36       | 2.37 | 1.26 | 6.57  | 69.1  |
| <i>Sparisoma chrysopterum</i>     | 0.04      | 0.12       | 2.17 | 0.99 | 6.02  | 75.12 |
| <i>Sparisoma rubripinne</i>       | 0.09      | 0.06       | 2.14 | 0.72 | 5.94  | 81.06 |
| <i>Scarus iseri</i> (F)           | 0.22      | 0.27       | 1.95 | 1.23 | 5.41  | 86.46 |
| <i>Sparisoma aurofrenatum</i> (M) | 0.23      | 0.27       | 1.69 | 1.34 | 4.69  | 91.15 |
|                                   | <b>SA</b> | <b>PRO</b> |      |      |       |       |
| <i>Sparisoma viride</i> (M)       | 0.23      | 0.47       | 5.01 | 1.42 | 14.43 | 14.43 |
| <i>Scarus taeniopterus</i> (F)    | 0.39      | 0.21       | 3.99 | 1.76 | 11.49 | 25.92 |
| <i>Sparisoma viride</i> (F)       | 0.37      | 0.49       | 3.71 | 1.35 | 10.66 | 36.58 |
| <i>Scarus taeniopterus</i> (M)    | 0.29      | 0.18       | 3.08 | 1.4  | 8.87  | 45.46 |
| <i>Scarus vetula</i> (F)          | 0.16      | 0.16       | 3.08 | 1.16 | 8.86  | 54.31 |
| <i>Sparisoma chrysopterum</i>     | 0.12      | 0.11       | 2.96 | 0.87 | 8.53  | 62.84 |
| <i>Scarus vetula</i> (M)          | 0.07      | 0.15       | 2.81 | 1.1  | 8.08  | 70.93 |
| <i>Sparisoma aurofrenatum</i> (F) | 0.36      | 0.28       | 2.35 | 1.22 | 6.78  | 77.7  |
| <i>Scarus iseri</i> (F)           | 0.27      | 0.18       | 1.88 | 1.28 | 5.42  | 83.12 |
| <i>Sparisoma aurofrenatum</i> (M) | 0.27      | 0.25       | 1.66 | 1.33 | 4.77  | 87.88 |
| <i>Sparisoma rubripinne</i>       | 0.06      | 0.05       | 1.55 | 0.68 | 4.45  | 92.33 |
