# Supplementary material for: Spatial variation of parrotfish assemblages at oceanic islands in the western Caribbean: evidence of indirect effects of fishing?
Source: PeerJ journal article supplement (doi:10.7717/peerj.14178), 2022-11-28
Supplement: Table_S8.pdf [file Table_S8.pdf]

**Table S8. Summary of SIMPER results for parrotfishes biomass data collected in 2019.** Average abundance (estandarized biomass) of species between location were significant differences were found, the average dissimilarity (Av.Diss), their contribution (Contrib%) to the within-group disssimilarity, and the cumulative total (Cum.%) of contributions (90% cut-off). Sex is detailed in the corresponding SIMPER summary (M: Males; F: Females)

| Locality                          | <b>SPECIES BIOMASS 2019</b>       |           |      |          |       |       |
|-----------------------------------|-----------------------------------|-----------|------|----------|-------|-------|
|                                   | Average abundance                 | Av. Diss  | SD   | Contrib% | Cum.% |       |
|                                   | <b>PRO</b>                        | <b>SA</b> |      |          |       |       |
| <i>Scarus taeniopterus</i>        | 0.08                              | 0.39      | 7.52 | 1.56     | 15.95 | 15.95 |
| <i>Sparisoma chrysopterum</i>     | 0.25                              | 0.2       | 6.27 | 1.06     | 13.29 | 29.24 |
| <i>Sparisoma rubripinne</i>       | 0.27                              | 0.09      | 5.66 | 1.26     | 11.99 | 41.24 |
| <i>Scarus coelestinus</i>         | 0.22                              | 0.05      | 5.19 | 0.79     | 11.01 | 52.24 |
| <i>Scarus vetula</i>              | 0.21                              | 0.26      | 5.13 | 1.35     | 10.87 | 63.11 |
| <i>Sparisoma viride</i>           | 0.56                              | 0.45      | 4.34 | 1.29     | 9.21  | 72.32 |
| <i>Sparisoma aurofrenatum</i>     | 0.28                              | 0.36      | 3.83 | 1.25     | 8.13  | 80.45 |
| <i>Scarus iseri</i>               | 0.18                              | 0.29      | 3.71 | 1.37     | 7.87  | 88.32 |
| <i>Scarus guacamaia</i>           | 0.1                               | 0.09      | 3.18 | 0.74     | 6.74  | 95.06 |
|                                   | <b>SPECIES (SEX) BIOMASS 2019</b> |           |      |          |       |       |
| <i>Sparisoma chrysopterum</i>     | 0.26                              | 0.22      | 5.4  | 1.1      | 12.22 | 12.22 |
| <i>Sparisoma rubripinne</i>       | 0.29                              | 0.11      | 5.19 | 1.27     | 11.75 | 23.97 |
| <i>Scarus taeniopterus</i> (F)    | 0.07                              | 0.29      | 4.47 | 1.59     | 10.1  | 34.08 |
| <i>Scarus taeniopterus</i> (M)    | 0.07                              | 0.27      | 4.46 | 1.39     | 10.09 | 44.16 |
| <i>Sparisoma viride</i> (M)       | 0.41                              | 0.27      | 4.08 | 1.23     | 9.22  | 53.38 |
| <i>Scarus vetula</i> (F)          | 0.17                              | 0.23      | 3.71 | 1.35     | 8.39  | 61.77 |
| <i>Sparisoma viride</i> (F)       | 0.41                              | 0.38      | 3.18 | 1.23     | 7.2   | 68.97 |
| <i>Scarus vetula</i> (M)          | 0.13                              | 0.11      | 2.83 | 1.08     | 6.41  | 75.38 |
| <i>Sparisoma aurofrenatum</i> (M) | 0.17                              | 0.25      | 2.79 | 1.37     | 6.3   | 81.68 |
| <i>Scarus iseri</i> (F)           | 0.13                              | 0.22      | 2.42 | 1.3      | 5.47  | 87.15 |
| <i>Sparisoma aurofrenatum</i> (F) | 0.25                              | 0.26      | 2.39 | 1.34     | 5.41  | 92.56 |
